# Supplementary material for: Estimating the EQ-5D-5L value set for the Philippines
Source: Qual Life Res. 2022 May 9;31(9):2763–74. doi: 10.1007/s11136-022-03143-w (PMC9356948; doi:10.1007/s11136-022-03143-w)
Supplement: Supplementary file 2 — Supplementary file2 (XLSX 207 kb) [file 11136_2022_3143_MOESM2_ESM.xlsx]

## Sheet: Sheet1
	Unadjusted		Rescaled*			Notes:
Health State	Predicted	SE	Predicted	SE		*-rescaling was done so that 1111 = 1.0 (perfect health)
11111	0.978921	0.00708476	1	0.00708476
21111	0.938706	0.00475821	0.958034	0.00475821
31111	0.928542	0.00702354	0.947427	0.00702354
41111	0.768511	0.00990137	0.78043	0.00990137
51111	0.676867	0.010632	0.691442	0.010632
12111	0.940591	0.0046465	0.960001	0.0046465
22111	0.900376	0.00579118	0.918036	0.00579118
32111	0.890212	0.00548603	0.907429	0.00548603
42111	0.73018	0.00843295	0.740432	0.00843295
52111	0.638537	0.009587	0.651443	0.009587
13111	0.930903	0.0067233	0.949892	0.0067233
23111	0.890688	0.00531599	0.907926	0.00531599
33111	0.880524	0.00855561	0.897319	0.00855561
43111	0.720493	0.00937922	0.730322	0.00937922
53111	0.628849	0.0100853	0.641334	0.0100853
14111	0.778373	0.00959785	0.790722	0.00959785
24111	0.738158	0.00796047	0.748757	0.00796047
34111	0.727994	0.00872334	0.73815	0.00872334
44111	0.567963	0.0130577	0.571153	0.0130577
54111	0.476319	0.0118712	0.482164	0.0118712
15111	0.691026	0.0103767	0.705905	0.0103767
25111	0.650811	0.00913717	0.66394	0.00913717
35111	0.640646	0.00927511	0.653333	0.00927511
45111	0.480615	0.0118995	0.486335	0.0118995
55111	0.388971	0.0118906	0.397347	0.0118906
11211	0.946023	0.00464218	0.96567	0.00464218
21211	0.905808	0.00557161	0.923704	0.00557161
31211	0.895644	0.00568291	0.913097	0.00568291
41211	0.735613	0.00855913	0.7461	0.00855913
51211	0.643969	0.00968708	0.657112	0.00968708
12211	0.907693	0.00533708	0.925671	0.00533708
22211	0.867478	0.00880219	0.883706	0.00880219
32211	0.857314	0.00697141	0.873099	0.00697141
42211	0.697282	0.00904847	0.706102	0.00904847
52211	0.605639	0.0104043	0.617113	0.0104043
13211	0.898005	0.00528486	0.915562	0.00528486
23211	0.85779	0.00693059	0.873596	0.00693059
33211	0.847626	0.00821797	0.862989	0.00821797
43211	0.687594	0.00863496	0.695992	0.00863496
53211	0.595951	0.00968943	0.607003	0.00968943
14211	0.745475	0.00826638	0.756392	0.00826638
24211	0.70526	0.00875385	0.714427	0.00875385
34211	0.695096	0.00799504	0.70382	0.00799504
44211	0.535065	0.0122712	0.536823	0.0122712
54211	0.443421	0.011251	0.447834	0.011251
15211	0.658128	0.00947204	0.671575	0.00947204
25211	0.617912	0.0101281	0.629609	0.0101281
35211	0.607748	0.00892644	0.619003	0.00892644
45211	0.447717	0.0112919	0.452005	0.0112919
55211	0.356073	0.0115272	0.363017	0.0115272
11311	0.937708	0.00652183	0.956993	0.00652183
21311	0.897493	0.00529291	0.915027	0.00529291
31311	0.887329	0.00842129	0.904421	0.00842129
41311	0.727298	0.00943557	0.737423	0.00943557
51311	0.635654	0.0101843	0.648435	0.0101843
12311	0.899378	0.00506393	0.916994	0.00506393
22311	0.859163	0.00711512	0.875029	0.00711512
32311	0.848999	0.00796226	0.864422	0.00796226
42311	0.688967	0.00859188	0.697425	0.00859188
52311	0.597324	0.00971107	0.608436	0.00971107
13311	0.88969	0.00803175	0.906885	0.00803175
23311	0.849475	0.00778459	0.864919	0.00778459
33311	0.839311	0.0110341	0.854312	0.0110341
43311	0.679279	0.0102922	0.687315	0.0102922
53311	0.587636	0.0109252	0.598327	0.0109252
14311	0.73716	0.00891092	0.747715	0.00891092
24311	0.696945	0.00798052	0.70575	0.00798052
34311	0.686781	0.00962446	0.695143	0.00962446
44311	0.52675	0.0125076	0.528146	0.0125076
54311	0.435106	0.0112496	0.439157	0.0112496
15311	0.649813	0.00964394	0.662898	0.00964394
25311	0.609598	0.00904721	0.620933	0.00904721
35311	0.599433	0.0100302	0.610326	0.0100302
45311	0.439402	0.0112062	0.443329	0.0112062
55311	0.347758	0.011183	0.35434	0.011183
11411	0.806795	0.00841914	0.820381	0.00841914
21411	0.76658	0.00767175	0.778415	0.00767175
31411	0.756415	0.00870715	0.767808	0.00870715
41411	0.596384	0.0125482	0.600811	0.0125482
51411	0.50474	0.0117219	0.511823	0.0117219
12411	0.768465	0.00778399	0.780382	0.00778399
22411	0.728249	0.00938431	0.738417	0.00938431
32411	0.718085	0.0086541	0.72781	0.0086541
42411	0.558054	0.0122002	0.560813	0.0122002
52411	0.46641	0.0116012	0.471824	0.0116012
13411	0.758777	0.00871067	0.770273	0.00871067
23411	0.718561	0.00862901	0.728307	0.00862901
33411	0.708397	0.0104722	0.7177	0.0104722
43411	0.548366	0.0125449	0.550703	0.0125449
53411	0.456722	0.0116646	0.461714	0.0116646
14411	0.606247	0.0129654	0.611103	0.0129654
24411	0.566032	0.0124451	0.569138	0.0124451
34411	0.555867	0.0125649	0.558531	0.0125649
44411	0.395836	0.0168884	0.391534	0.0168884
54411	0.304192	0.0148521	0.302545	0.0148521
15411	0.518899	0.0125821	0.526286	0.0125821
25411	0.478684	0.0122331	0.48432	0.0122331
35411	0.468519	0.0119355	0.473714	0.0119355
45411	0.308488	0.0151974	0.306716	0.0151974
55411	0.216845	0.0139892	0.217728	0.0139892
11511	0.731826	0.00922775	0.747584	0.00922775
21511	0.691611	0.009178	0.705618	0.009178
31511	0.681446	0.00966677	0.695011	0.00966677
41511	0.521415	0.0117902	0.528014	0.0117902
51511	0.429771	0.0120645	0.439025	0.0120645
12511	0.693496	0.00932539	0.707585	0.00932539
22511	0.65328	0.0112048	0.665619	0.0112048
32511	0.643116	0.0102288	0.655013	0.0102288
42511	0.483085	0.0119374	0.488015	0.0119374
52511	0.391441	0.0124434	0.399027	0.0124434
13511	0.683808	0.00975993	0.697476	0.00975993
23511	0.643592	0.0102446	0.65551	0.0102446
33511	0.633428	0.011507	0.644903	0.011507
43511	0.473397	0.0120016	0.477906	0.0120016
53511	0.381753	0.0122197	0.388917	0.0122197
14511	0.531278	0.0126156	0.538306	0.0126156
24511	0.491063	0.0125316	0.49634	0.0125316
34511	0.480898	0.0123406	0.485734	0.0123406
44511	0.320867	0.0156061	0.318736	0.0156061
54511	0.229223	0.0143358	0.229748	0.0143358
15511	0.44393	0.0133477	0.453489	0.0133477
25511	0.403715	0.0134392	0.411523	0.0134392
35511	0.39355	0.0128714	0.400916	0.0128714
45511	0.233519	0.0147681	0.233919	0.0147681
55511	0.141876	0.0144716	0.144931	0.0144716
11121	0.929972	0.00465182	0.948919	0.00465182
21121	0.889756	0.00655926	0.906954	0.00655926
31121	0.879592	0.00616038	0.896347	0.00616038
41121	0.719561	0.0084311	0.72935	0.0084311
51121	0.627917	0.00980127	0.640361	0.00980127
12121	0.891641	0.00618654	0.908921	0.00618654
22121	0.851426	0.00995785	0.866955	0.00995785
32121	0.841262	0.00799716	0.856348	0.00799716
42121	0.681231	0.00945509	0.689351	0.00945509
52121	0.589587	0.0109624	0.600363	0.0109624
13121	0.881954	0.00559334	0.898811	0.00559334
23121	0.841738	0.00795489	0.856846	0.00795489
33121	0.831574	0.0087439	0.846239	0.0087439
43121	0.671543	0.00869789	0.679242	0.00869789
53121	0.579899	0.00996878	0.590253	0.00996878
14121	0.729424	0.00760202	0.739642	0.00760202
24121	0.689208	0.00883056	0.697676	0.00883056
34121	0.679044	0.00767746	0.687069	0.00767746
44121	0.519013	0.0117378	0.520072	0.0117378
54121	0.427369	0.010871	0.431084	0.010871
15121	0.642076	0.00892576	0.654825	0.00892576
25121	0.601861	0.0102186	0.612859	0.0102186
35121	0.591696	0.00867157	0.602252	0.00867157
45121	0.431665	0.0107327	0.435255	0.0107327
55121	0.340022	0.0111786	0.346266	0.0111786
11221	0.897074	0.00596689	0.914589	0.00596689
21221	0.856858	0.00969714	0.872624	0.00969714
31221	0.846694	0.00797021	0.862017	0.00797021
41221	0.686663	0.0094294	0.69502	0.0094294
51221	0.595019	0.0109304	0.606031	0.0109304
12221	0.858743	0.00936889	0.874591	0.00936889
22221	0.818528	0.0136275	0.832625	0.0136275
32221	0.808364	0.0111833	0.822018	0.0111833
42221	0.648333	0.0119485	0.655021	0.0119485
52221	0.556689	0.0133837	0.566033	0.0133837
13221	0.849055	0.00752469	0.864481	0.00752469
23221	0.80884	0.0112099	0.822515	0.0112099
33221	0.798676	0.010649	0.811909	0.010649
43221	0.638645	0.0102398	0.644911	0.0102398
53221	0.547001	0.0115826	0.555923	0.0115826
14221	0.696526	0.00875291	0.705312	0.00875291
24221	0.65631	0.0115693	0.663346	0.0115693
34221	0.646146	0.00945387	0.652739	0.00945387
44221	0.486115	0.0126674	0.485742	0.0126674
54221	0.394471	0.0121015	0.396754	0.0121015
15221	0.609178	0.0102138	0.620495	0.0102138
25221	0.568963	0.0128887	0.578529	0.0128887
35221	0.558798	0.0105574	0.567922	0.0105574
45221	0.398767	0.0119879	0.400925	0.0119879
55221	0.307124	0.0126119	0.311936	0.0126119
11321	0.888759	0.0055931	0.905912	0.0055931
21321	0.848543	0.00810562	0.863947	0.00810562
31321	0.838379	0.00876591	0.85334	0.00876591
41321	0.678348	0.00890951	0.686343	0.00890951
51321	0.586704	0.0102004	0.597354	0.0102004
12321	0.850428	0.00772201	0.865914	0.00772201
22321	0.810213	0.0115563	0.823948	0.0115563
32321	0.800049	0.0107032	0.813341	0.0107032
42321	0.640018	0.0104598	0.646344	0.0104598
52321	0.548374	0.0118267	0.557356	0.0118267
13321	0.840741	0.00823982	0.855804	0.00823982
23321	0.800525	0.0106265	0.813839	0.0106265
33321	0.790361	0.0119295	0.803232	0.0119295
43321	0.63033	0.0105316	0.636235	0.0105316
53321	0.538686	0.0115899	0.547246	0.0115899
14321	0.688211	0.00789806	0.696635	0.00789806
24321	0.647995	0.0097776	0.654669	0.0097776
34321	0.637831	0.00963222	0.644062	0.00963222
44321	0.4778	0.011875	0.477065	0.011875
54321	0.386156	0.0110049	0.388077	0.0110049
15321	0.600863	0.00907206	0.611818	0.00907206
25321	0.560648	0.0109584	0.569852	0.0109584
35321	0.550483	0.0103478	0.559245	0.0103478
45321	0.390452	0.0107925	0.392248	0.0107925
55321	0.298809	0.0112221	0.303259	0.0112221
11421	0.757845	0.00757252	0.7693	0.00757252
21421	0.71763	0.00970848	0.727335	0.00970848
31421	0.707465	0.00891349	0.716728	0.00891349
41421	0.547434	0.0120631	0.549731	0.0120631
51421	0.455791	0.0116381	0.460742	0.0116381
12421	0.719515	0.00960673	0.729302	0.00960673
22421	0.6793	0.0129885	0.687336	0.0129885
32421	0.669135	0.0111251	0.676729	0.0111251
42421	0.509104	0.0134961	0.509732	0.0134961
52421	0.41746	0.0133367	0.420743	0.0133367
13421	0.709827	0.00877348	0.719192	0.00877348
23421	0.669612	0.0111578	0.677226	0.0111578
33421	0.659447	0.0113111	0.66662	0.0113111
43421	0.499416	0.012652	0.499622	0.012652
53421	0.407773	0.0121959	0.410634	0.0121959
14421	0.557297	0.012198	0.560023	0.012198
24421	0.517082	0.0135833	0.518057	0.0135833
34421	0.506917	0.0124796	0.50745	0.0124796
44421	0.346886	0.0163556	0.340453	0.0163556
54421	0.255243	0.0145895	0.251465	0.0145895
15421	0.469949	0.0120548	0.475205	0.0120548
25421	0.429734	0.0136233	0.43324	0.0136233
35421	0.41957	0.0121095	0.422633	0.0121095
45421	0.259538	0.0148179	0.255636	0.0148179
55421	0.167895	0.0139387	0.166647	0.0139387
11521	0.682876	0.00925861	0.696503	0.00925861
21521	0.642661	0.0115648	0.654537	0.0115648
31521	0.632496	0.0105447	0.643931	0.0105447
41521	0.472465	0.0118819	0.476933	0.0118819
51521	0.380822	0.012558	0.387945	0.012558
12521	0.644546	0.0115226	0.656505	0.0115226
22521	0.604331	0.0148423	0.614539	0.0148423
32521	0.594166	0.0129465	0.603932	0.0129465
42521	0.434135	0.0137808	0.436935	0.0137808
52521	0.342492	0.014568	0.347946	0.014568
13521	0.634858	0.0105102	0.646395	0.0105102
23521	0.594643	0.0130037	0.604429	0.0130037
33521	0.584478	0.0128372	0.593822	0.0128372
43521	0.424447	0.0126825	0.426825	0.0126825
53521	0.332804	0.0132706	0.337837	0.0132706
14521	0.482328	0.0124077	0.487226	0.0124077
24521	0.442113	0.0141695	0.44526	0.0141695
34521	0.431948	0.0128165	0.434653	0.0128165
44521	0.271917	0.0154903	0.267656	0.0154903
54521	0.180274	0.0145566	0.178667	0.0145566
15521	0.39498	0.0133895	0.402408	0.0133895
25521	0.354765	0.0151878	0.360443	0.0151878
35521	0.344601	0.0135634	0.349836	0.0135634
45521	0.184569	0.0148599	0.182839	0.0148599
55521	0.0929259	0.0149039	0.0938502	0.0149039
11131	0.9176	0.00774738	0.936009	0.00774738
21131	0.877384	0.00664977	0.894043	0.00664977
31131	0.86722	0.0101261	0.883436	0.0101261
41131	0.707189	0.0100342	0.716439	0.0100342
51131	0.615545	0.0108339	0.627451	0.0108339
12131	0.879269	0.00627575	0.89601	0.00627575
22131	0.839054	0.00794252	0.854045	0.00794252
32131	0.82889	0.0095536	0.843438	0.0095536
42131	0.668859	0.00904048	0.676441	0.00904048
52131	0.577215	0.0102084	0.587452	0.0102084
13131	0.869581	0.0096049	0.885901	0.0096049
23131	0.829366	0.0093307	0.843935	0.0093307
33131	0.819202	0.0127918	0.833328	0.0127918
43131	0.659171	0.0113067	0.666331	0.0113067
53131	0.567527	0.0119696	0.577342	0.0119696
14131	0.717052	0.00883748	0.726731	0.00883748
24131	0.676836	0.0078168	0.684766	0.0078168
34131	0.666672	0.0102693	0.674159	0.0102693
44131	0.506641	0.0122191	0.507162	0.0122191
54131	0.414997	0.0110188	0.418173	0.0110188
15131	0.629704	0.00937117	0.641914	0.00937117
25131	0.589489	0.00868229	0.599948	0.00868229
35131	0.579324	0.0104666	0.589342	0.0104666
45131	0.419293	0.0107033	0.422344	0.0107033
55131	0.32765	0.0107721	0.333356	0.0107721
11231	0.884701	0.00652028	0.901679	0.00652028
21231	0.844486	0.00798485	0.859713	0.00798485
31231	0.834322	0.00983053	0.849106	0.00983053
41231	0.674291	0.00932971	0.682109	0.00932971
51231	0.582647	0.0104551	0.593121	0.0104551
12231	0.846371	0.00757732	0.86168	0.00757732
22231	0.806156	0.0108702	0.819715	0.0108702
32231	0.795992	0.010996	0.809108	0.010996
42231	0.635961	0.0101797	0.64211	0.0101797
52231	0.544317	0.0114755	0.553122	0.0114755
13231	0.836683	0.00927994	0.851571	0.00927994
23231	0.796468	0.0108615	0.809605	0.0108615
33231	0.786304	0.0130039	0.798998	0.0130039
43231	0.626273	0.0112058	0.632001	0.0112058
53231	0.534629	0.012107	0.543012	0.012107
14231	0.684153	0.00809022	0.692401	0.00809022
24231	0.643938	0.00924658	0.650436	0.00924658
34231	0.633774	0.0102186	0.639829	0.0102186
44231	0.473743	0.0118542	0.472832	0.0118542
54231	0.382099	0.0108725	0.383843	0.0108725
15231	0.596806	0.00899996	0.607584	0.00899996
25231	0.556591	0.0102766	0.565618	0.0102766
35231	0.546426	0.010693	0.555011	0.010693
45231	0.386395	0.0105644	0.388014	0.0105644
55231	0.294752	0.0108932	0.299026	0.0108932
11331	0.876387	0.00947219	0.893002	0.00947219
21331	0.836171	0.0093249	0.851036	0.0093249
31331	0.826007	0.0127077	0.840429	0.0127077
41331	0.665976	0.0113595	0.673432	0.0113595
51331	0.574332	0.0120588	0.584444	0.0120588
12331	0.838056	0.0089888	0.853003	0.0089888
22331	0.797841	0.0108412	0.811038	0.0108412
32331	0.787677	0.0127253	0.800431	0.0127253
42331	0.627646	0.0110361	0.633434	0.0110361
52331	0.536002	0.0119986	0.544445	0.0119986
13331	0.828368	0.0122033	0.842894	0.0122033
23331	0.788153	0.0125205	0.800928	0.0125205
33331	0.777989	0.0157969	0.790321	0.0157969
43331	0.617958	0.0135337	0.623324	0.0135337
53331	0.526314	0.0140811	0.534335	0.0140811
14331	0.675839	0.0101364	0.683724	0.0101364
24331	0.635623	0.00993892	0.641759	0.00993892
34331	0.625459	0.0126235	0.631152	0.0126235
44331	0.465428	0.0131379	0.464155	0.0131379
54331	0.373784	0.0120167	0.375166	0.0120167
15331	0.588491	0.0105123	0.598907	0.0105123
25331	0.548276	0.0105407	0.556941	0.0105407
35331	0.538111	0.0127078	0.546335	0.0127078
45331	0.37808	0.0116578	0.379337	0.0116578
55331	0.286437	0.0117076	0.290349	0.0117076
11431	0.745473	0.00910792	0.75639	0.00910792
21431	0.705258	0.00909279	0.714424	0.00909279
31431	0.695093	0.0114571	0.703817	0.0114571
41431	0.535062	0.0127416	0.53682	0.0127416
51431	0.443419	0.0119992	0.447831	0.0119992
12431	0.707143	0.00897941	0.716391	0.00897941
22431	0.666927	0.0109479	0.674425	0.0109479
32431	0.656763	0.0117606	0.663819	0.0117606
42431	0.496732	0.0127164	0.496821	0.0127164
52431	0.405088	0.012212	0.407833	0.012212
13431	0.697455	0.011188	0.706281	0.011188
23431	0.65724	0.0116407	0.664316	0.0116407
33431	0.647075	0.0142247	0.653709	0.0142247
43431	0.487044	0.0141241	0.486712	0.0141241
53431	0.3954	0.0134113	0.397723	0.0134113
14431	0.544925	0.0125032	0.547112	0.0125032
24431	0.50471	0.0124442	0.505146	0.0124442
34431	0.494545	0.0137653	0.49454	0.0137653
44431	0.334514	0.0163176	0.327542	0.0163176
54431	0.242871	0.014259	0.238554	0.014259
15431	0.457577	0.0118615	0.462295	0.0118615
25431	0.417362	0.0119911	0.420329	0.0119911
35431	0.407198	0.0129701	0.409722	0.0129701
45431	0.247166	0.0143586	0.242725	0.0143586
55431	0.155523	0.0131374	0.153737	0.0131374
11531	0.670504	0.0101049	0.683593	0.0101049
21531	0.630289	0.0106275	0.641627	0.0106275
31531	0.620124	0.012401	0.63102	0.012401
41531	0.460093	0.0121978	0.464023	0.0121978
51531	0.36845	0.0125306	0.375034	0.0125306
12531	0.632174	0.0105777	0.643594	0.0105777
22531	0.591959	0.0127367	0.601628	0.0127367
32531	0.581794	0.0131504	0.591021	0.0131504
42531	0.421763	0.0126589	0.424024	0.0126589
52531	0.330119	0.0132011	0.335036	0.0132011
13531	0.622486	0.0122245	0.633484	0.0122245
23531	0.582271	0.0130722	0.591519	0.0130722
33531	0.572106	0.0151648	0.580912	0.0151648
43531	0.412075	0.0138217	0.413915	0.0138217
53531	0.320432	0.0140716	0.324926	0.0140716
14531	0.469956	0.0123396	0.474315	0.0123396
24531	0.429741	0.0127242	0.432349	0.0127242
34531	0.419576	0.0137398	0.421743	0.0137398
44531	0.259545	0.0151487	0.254745	0.0151487
54531	0.167902	0.0138973	0.165757	0.0138973
15531	0.382608	0.0128621	0.389498	0.0128621
25531	0.342393	0.0134028	0.347532	0.0134028
35531	0.332229	0.0140116	0.336925	0.0140116
45531	0.172197	0.014078	0.169928	0.014078
55531	0.0805539	0.0138278	0.0809396	0.0138278
11141	0.72281	0.010449	0.73274	0.010449
21141	0.682595	0.00852028	0.690775	0.00852028
31141	0.67243	0.010779	0.680168	0.010779
41141	0.512399	0.0138985	0.513171	0.0138985
51141	0.420756	0.0128397	0.424182	0.0128397
12141	0.68448	0.00825706	0.692742	0.00825706
22141	0.644265	0.00843169	0.650776	0.00843169
32141	0.6341	0.00919537	0.640169	0.00919537
42141	0.474069	0.0124035	0.473172	0.0124035
52141	0.382425	0.0114599	0.384183	0.0114599
13141	0.674792	0.0103408	0.682632	0.0103408
23141	0.634577	0.00899758	0.640666	0.00899758
33141	0.624412	0.0119498	0.63006	0.0119498
43141	0.464381	0.0136324	0.463062	0.0136324
53141	0.372738	0.012501	0.374074	0.012501
14141	0.522262	0.0128701	0.523463	0.0128701
24141	0.482047	0.0113074	0.481497	0.0113074
34141	0.471882	0.0125494	0.47089	0.0125494
44141	0.311851	0.0167382	0.303893	0.0167382
54141	0.220208	0.0143971	0.214904	0.0143971
15141	0.434914	0.0114583	0.438645	0.0114583
25141	0.394699	0.00990316	0.39668	0.00990316
35141	0.384535	0.0108404	0.386073	0.0108404
45141	0.224503	0.0141901	0.219076	0.0141901
55141	0.13286	0.0125633	0.130087	0.0125633
11241	0.689912	0.00852546	0.69841	0.00852546
21241	0.649697	0.00855237	0.656444	0.00855237
31241	0.639532	0.00955501	0.645838	0.00955501
41241	0.479501	0.0126702	0.47884	0.0126702
51241	0.387858	0.011739	0.389852	0.011739
12241	0.651582	0.00819872	0.658412	0.00819872
22241	0.611366	0.0103528	0.616446	0.0103528
32241	0.601202	0.00975727	0.605839	0.00975727
42241	0.441171	0.0125201	0.438842	0.0125201
52241	0.349527	0.0118244	0.349853	0.0118244
13241	0.641894	0.00904463	0.648302	0.00904463
23241	0.601679	0.00963719	0.606336	0.00963719
33241	0.591514	0.0113701	0.595729	0.0113701
43241	0.431483	0.0128289	0.428732	0.0128289
53241	0.339839	0.0118571	0.339744	0.0118571
14241	0.489364	0.0115758	0.489133	0.0115758
24241	0.449149	0.011544	0.447167	0.011544
34241	0.438984	0.0117242	0.43656	0.0117242
44241	0.278953	0.0158868	0.269563	0.0158868
54241	0.18731	0.0136045	0.180574	0.0136045
15241	0.402016	0.0102705	0.404315	0.0102705
25241	0.361801	0.0104551	0.36235	0.0104551
35241	0.351637	0.0101644	0.351743	0.0101644
45241	0.191605	0.0133945	0.184746	0.0133945
55241	0.0999618	0.0118941	0.0957572	0.0118941
11341	0.681597	0.0103622	0.689733	0.0103622
21341	0.641382	0.00915547	0.647768	0.00915547
31341	0.631217	0.0119845	0.637161	0.0119845
41341	0.471186	0.0137846	0.470164	0.0137846
51341	0.379543	0.012704	0.381175	0.012704
12341	0.643267	0.0088366	0.649735	0.0088366
22341	0.603051	0.0096971	0.607769	0.0096971
32341	0.592887	0.0111225	0.597162	0.0111225
42341	0.432856	0.0127438	0.430165	0.0127438
52341	0.341212	0.0118143	0.341176	0.0118143
13341	0.633579	0.0114931	0.639625	0.0114931
23341	0.593364	0.0109156	0.597659	0.0109156
33341	0.583199	0.014043	0.587053	0.014043
43341	0.423168	0.0144795	0.420055	0.0144795
53341	0.331524	0.013408	0.331067	0.013408
14341	0.481049	0.0126007	0.480456	0.0126007
24341	0.440834	0.0115771	0.43849	0.0115771
34341	0.430669	0.0134117	0.427883	0.0134117
44341	0.270638	0.0164911	0.260886	0.0164911
54341	0.178995	0.0140981	0.171897	0.0140981
15341	0.393701	0.0110669	0.395638	0.0110669
25341	0.353486	0.0101138	0.353673	0.0101138
35341	0.343322	0.011745	0.343066	0.011745
45341	0.18329	0.0138273	0.176069	0.0138273
55341	0.0916468	0.0121392	0.0870802	0.0121392
11441	0.550683	0.0125246	0.553121	0.0125246
21441	0.510468	0.0116536	0.511155	0.0116536
31441	0.500304	0.0130257	0.500549	0.0130257
41441	0.340272	0.0167207	0.333551	0.0167207
51441	0.248629	0.0147043	0.244563	0.0147043
12441	0.512353	0.0115834	0.513122	0.0115834
22441	0.472138	0.0123538	0.471157	0.0123538
32441	0.461973	0.0125039	0.46055	0.0125039
42441	0.301942	0.0160802	0.293553	0.0160802
52441	0.210299	0.0141776	0.204564	0.0141776
13441	0.502665	0.0128297	0.503013	0.0128297
23441	0.46245	0.0124158	0.461047	0.0124158
33441	0.452285	0.0143619	0.45044	0.0143619
43441	0.292254	0.0168001	0.283443	0.0168001
53441	0.200611	0.0147519	0.194455	0.0147519
14441	0.350135	0.0163896	0.343844	0.0163896
24441	0.30992	0.015696	0.301878	0.015696
34441	0.299756	0.0163176	0.291271	0.0163176
44441	0.139724	0.0205397	0.124274	0.0205397
54441	0.0480808	0.0177182	0.0352853	0.0177182
15441	0.262787	0.0144542	0.259026	0.0144542
25441	0.222572	0.0138286	0.217061	0.0138286
35441	0.212408	0.0141754	0.206454	0.0141754
45441	0.0523765	0.0178247	0.0394566	0.0178247
55441	-0.0392669	0.0154642	-0.0495319	0.0154642
11541	0.475714	0.0116033	0.480324	0.0116033
21541	0.435499	0.0111663	0.438358	0.0111663
31541	0.425335	0.0122801	0.427751	0.0122801
41541	0.265303	0.0149879	0.260754	0.0149879
51541	0.17366	0.0137064	0.171766	0.0137064
12541	0.437384	0.0111377	0.440325	0.0111377
22541	0.397169	0.0123936	0.39836	0.0123936
32541	0.387004	0.0122304	0.387753	0.0122304
42541	0.226973	0.0146878	0.220756	0.0146878
52541	0.13533	0.0135924	0.131767	0.0135924
13541	0.427696	0.0121442	0.430216	0.0121442
23541	0.387481	0.0121714	0.38825	0.0121714
33541	0.377317	0.0138747	0.377643	0.0138747
43541	0.217285	0.0152449	0.210646	0.0152449
53541	0.125642	0.013942	0.121658	0.013942
14541	0.275166	0.0149389	0.271046	0.0149389
24541	0.234951	0.0145611	0.229081	0.0145611
34541	0.224787	0.0149725	0.218474	0.0149725
44541	0.0647553	0.0185395	0.0514767	0.0185395
54541	-0.0268881	0.0161976	-0.0375118	0.0161976
15541	0.187818	0.0138663	0.186229	0.0138663
25541	0.147603	0.0136269	0.144263	0.0136269
35541	0.137439	0.0136988	0.133657	0.0136988
45541	-0.0225924	0.0163815	-0.0333406	0.0163815
55541	-0.114236	0.0147096	-0.122329	0.0147096
11151	0.611262	0.0115389	0.624424	0.0115389
21151	0.571046	0.00995385	0.582458	0.00995385
31151	0.560882	0.012036	0.571851	0.012036
41151	0.400851	0.0126119	0.404854	0.0126119
51151	0.309207	0.0131979	0.315865	0.0131979
12151	0.572932	0.00963646	0.584425	0.00963646
22151	0.532716	0.00991442	0.542459	0.00991442
32151	0.522552	0.0106748	0.531853	0.0106748
42151	0.362521	0.0109753	0.364855	0.0109753
52151	0.270877	0.0118902	0.275867	0.0118902
13151	0.563244	0.0115436	0.574315	0.0115436
23151	0.523028	0.0104784	0.53235	0.0104784
33151	0.512864	0.0131846	0.521743	0.0131846
43151	0.352833	0.0124133	0.354746	0.0124133
53151	0.261189	0.0129599	0.265757	0.0129599
14151	0.410714	0.011203	0.415146	0.011203
24151	0.370498	0.00949965	0.37318	0.00949965
34151	0.360334	0.0110484	0.362574	0.0110484
44151	0.200303	0.0134893	0.195576	0.0134893
54151	0.108659	0.0123494	0.106588	0.0123494
15151	0.323366	0.0113435	0.330329	0.0113435
25151	0.283151	0.00989817	0.288363	0.00989817
35151	0.272986	0.0109366	0.277756	0.0109366
45151	0.112955	0.0118603	0.110759	0.0118603
55151	0.0213117	0.0118567	0.0217706	0.0118567
11251	0.578364	0.00989612	0.590094	0.00989612
21251	0.538148	0.0100455	0.548128	0.0100455
31251	0.527984	0.0110119	0.537521	0.0110119
41251	0.367953	0.011301	0.370524	0.011301
51251	0.276309	0.0121826	0.281535	0.0121826
12251	0.540033	0.00965336	0.550095	0.00965336
22251	0.499818	0.0116477	0.508129	0.0116477
32251	0.489654	0.0112199	0.497522	0.0112199
42251	0.329623	0.0111646	0.330525	0.0111646
52251	0.237979	0.0122942	0.241537	0.0122942
13251	0.530346	0.01046	0.539985	0.01046
23251	0.49013	0.0110906	0.49802	0.0110906
33251	0.479966	0.0127122	0.487413	0.0127122
43251	0.319935	0.0115808	0.320416	0.0115808
53251	0.228291	0.012392	0.231427	0.012392
14251	0.377816	0.0097546	0.380816	0.0097546
24251	0.3376	0.00984559	0.33885	0.00984559
34251	0.327436	0.0101648	0.328243	0.0101648
44251	0.167405	0.0124688	0.161246	0.0124688
54251	0.0757614	0.0114716	0.0722578	0.0114716
15251	0.290468	0.0102054	0.295999	0.0102054
25251	0.250253	0.0105117	0.254033	0.0105117
35251	0.240088	0.0103293	0.243426	0.0103293
45251	0.0800571	0.0109548	0.0764291	0.0109548
55251	-0.0115863	0.0112027	-0.0125595	0.0112027
11351	0.570049	0.0115857	0.581417	0.0115857
21351	0.529833	0.0106394	0.539451	0.0106394
31351	0.519669	0.0132362	0.528844	0.0132362
41351	0.359638	0.0126014	0.361847	0.0126014
51351	0.267994	0.0131761	0.272858	0.0131761
12351	0.531719	0.010279	0.541418	0.010279
22351	0.491503	0.0111412	0.499452	0.0111412
32351	0.481339	0.0124898	0.488846	0.0124898
42351	0.321308	0.011485	0.321848	0.011485
52351	0.229664	0.0123496	0.23286	0.0123496
13351	0.522031	0.0127005	0.531308	0.0127005
23351	0.481815	0.0122834	0.489343	0.0122834
33351	0.471651	0.0152029	0.478736	0.0152029
43351	0.31162	0.0134459	0.311739	0.0134459
53351	0.219976	0.0139409	0.22275	0.0139409
14351	0.369501	0.0110243	0.372139	0.0110243
24351	0.329285	0.00996525	0.330173	0.00996525
34351	0.319121	0.0121385	0.319567	0.0121385
44351	0.15909	0.0132907	0.152569	0.0132907
54351	0.0674464	0.0121193	0.0635809	0.0121193
15351	0.282153	0.0110792	0.287322	0.0110792
25351	0.241938	0.0102509	0.245356	0.0102509
35351	0.231773	0.0119554	0.234749	0.0119554
45351	0.0717421	0.0115496	0.0677521	0.0115496
55351	-0.0199013	0.0115323	-0.0212364	0.0115323
11451	0.439135	0.0113765	0.444804	0.0113765
21451	0.39892	0.0105302	0.402839	0.0105302
31451	0.388755	0.0121219	0.392232	0.0121219
41451	0.228724	0.0139309	0.225235	0.0139309
51451	0.137081	0.0131962	0.136246	0.0131962
12451	0.400805	0.010366	0.404806	0.010366
22451	0.36059	0.011332	0.36284	0.011332
32451	0.350425	0.0115905	0.352233	0.0115905
42451	0.190394	0.0131825	0.185236	0.0131825
52451	0.0987505	0.012635	0.0962477	0.012635
13451	0.391117	0.0118118	0.394696	0.0118118
23451	0.350902	0.0114712	0.352731	0.0114712
33451	0.340737	0.0136343	0.342124	0.0136343
43451	0.180706	0.0141098	0.175127	0.0141098
53451	0.0890626	0.0133378	0.086138	0.0133378
14451	0.238587	0.0133072	0.235527	0.0133072
24451	0.198372	0.0125438	0.193561	0.0125438
34451	0.188207	0.0133955	0.182954	0.0133955
44451	0.0281761	0.0165005	0.0159572	0.0165005
54451	-0.0634673	0.0144138	-0.0730313	0.0144138
15451	0.151239	0.0124458	0.15071	0.0124458
25451	0.111024	0.0118205	0.108744	0.0118205
35451	0.10086	0.0123138	0.0981372	0.0123138
45451	-0.0591716	0.0143395	-0.06886	0.0143395
55451	-0.150815	0.0130568	-0.157849	0.0130568
11551	0.364166	0.0118729	0.372007	0.0118729
21551	0.323951	0.0115558	0.330042	0.0115558
31551	0.313786	0.0127218	0.319435	0.0127218
41551	0.153755	0.0131489	0.152438	0.0131489
51551	0.0621117	0.0133999	0.0634491	0.0133999
12551	0.325836	0.0114497	0.332009	0.0114497
22551	0.285621	0.0127737	0.290043	0.0127737
32551	0.275456	0.0127021	0.279436	0.0127021
42551	0.115425	0.0128338	0.112439	0.0128338
52551	0.0237816	0.0133103	0.0234505	0.0133103
13551	0.316148	0.0124967	0.321899	0.0124967
23551	0.275933	0.0126234	0.279933	0.0126234
33551	0.265768	0.0143494	0.269327	0.0143494
43551	0.105737	0.0135285	0.102329	0.0135285
53551	0.0140937	0.0137269	0.0133409	0.0137269
14551	0.163618	0.0128609	0.16273	0.0128609
24551	0.123403	0.0125211	0.120764	0.0125211
34551	0.113238	0.0130814	0.110157	0.0130814
44551	-0.0467929	0.0150954	-0.0568399	0.0150954
54551	-0.138436	0.0137826	-0.145828	0.0137826
15551	0.0762703	0.0131157	0.0779126	0.0131157
25551	0.0360551	0.0129599	0.0359469	0.0129599
35551	0.0258907	0.0131193	0.0253401	0.0131193
45551	-0.134141	0.0137851	-0.141657	0.0137851
55551	-0.225784	0.0134716	-0.230646	0.0134716
11112	0.951883	0.00518598	0.971785	0.00518598
21112	0.911668	0.00514868	0.929819	0.00514868
31112	0.901503	0.00584675	0.919212	0.00584675
41112	0.741472	0.00859422	0.752215	0.00859422
51112	0.649829	0.00977479	0.663226	0.00977479
12112	0.913553	0.00489115	0.931786	0.00489115
22112	0.873338	0.00793971	0.88982	0.00793971
32112	0.863173	0.00637055	0.879213	0.00637055
42112	0.703142	0.00851886	0.712216	0.00851886
52112	0.611499	0.0100026	0.623228	0.0100026
13112	0.903865	0.00541831	0.921676	0.00541831
23112	0.86365	0.0062915	0.879711	0.0062915
33112	0.853485	0.00809369	0.869104	0.00809369
43112	0.693454	0.00844087	0.702107	0.00844087
53112	0.601811	0.00957476	0.613118	0.00957476
14112	0.751335	0.00816158	0.762507	0.00816158
24112	0.71112	0.0080641	0.720541	0.0080641
34112	0.700955	0.00766442	0.709935	0.00766442
44112	0.540924	0.0120049	0.542937	0.0120049
54112	0.449281	0.0110103	0.453949	0.0110103
15112	0.663987	0.00937758	0.67769	0.00937758
25112	0.623772	0.00953517	0.635724	0.00953517
35112	0.613608	0.00862817	0.625117	0.00862817
45112	0.453576	0.0109993	0.45812	0.0109993
55112	0.361933	0.0112897	0.369132	0.0112897
11212	0.918985	0.00458196	0.937455	0.00458196
21212	0.87877	0.0075931	0.895489	0.0075931
31212	0.868605	0.00631616	0.884882	0.00631616
41212	0.708574	0.00847504	0.717885	0.00847504
51212	0.616931	0.00995446	0.628896	0.00995446
12212	0.880655	0.00731859	0.897456	0.00731859
22212	0.84044	0.0113896	0.85549	0.0113896
32212	0.830275	0.0090461	0.844883	0.0090461
42212	0.670244	0.0102993	0.677886	0.0102993
52212	0.578601	0.0117955	0.588898	0.0117955
13212	0.870967	0.00590162	0.887346	0.00590162
23212	0.830752	0.00906093	0.845381	0.00906093
33212	0.820587	0.00908781	0.834774	0.00908781
43212	0.660556	0.00897691	0.667777	0.00897691
53212	0.568913	0.0103243	0.578788	0.0103243
14212	0.718437	0.00809752	0.728177	0.00809752
24212	0.678222	0.0100516	0.686211	0.0100516
34212	0.668057	0.00832534	0.675604	0.00832534
44212	0.508026	0.012122	0.508607	0.012122
54212	0.416383	0.0113855	0.419619	0.0113855
15212	0.631089	0.0096295	0.64336	0.0096295
25212	0.590874	0.0115219	0.601394	0.0115219
35212	0.58071	0.00953116	0.590787	0.00953116
45212	0.420678	0.0113859	0.42379	0.0113859
55212	0.329035	0.0119034	0.334802	0.0119034
11312	0.91067	0.00515503	0.928778	0.00515503
21312	0.870455	0.00626281	0.886812	0.00626281
31312	0.86029	0.00794431	0.876205	0.00794431
41312	0.700259	0.00849666	0.709208	0.00849666
51312	0.608616	0.00967302	0.620219	0.00967302
12312	0.87234	0.00594275	0.888779	0.00594275
22312	0.832125	0.00935231	0.846813	0.00935231
32312	0.82196	0.00901246	0.836207	0.00901246
42312	0.661929	0.00908936	0.669209	0.00908936
52312	0.570286	0.0104778	0.580221	0.0104778
13312	0.862652	0.00748358	0.878669	0.00748358
23312	0.822437	0.00890296	0.836704	0.00890296
33312	0.812272	0.0110182	0.826097	0.0110182
43312	0.652241	0.00982581	0.6591	0.00982581
53312	0.560598	0.010801	0.570111	0.010801
14312	0.710122	0.00782539	0.7195	0.00782539
24312	0.669907	0.00852578	0.677534	0.00852578
34312	0.659742	0.00908935	0.666928	0.00908935
44312	0.499711	0.0117216	0.49993	0.0117216
54312	0.408068	0.0106861	0.410942	0.0106861
15312	0.622774	0.00897824	0.634683	0.00897824
25312	0.582559	0.0098297	0.592717	0.0098297
35312	0.572395	0.00981645	0.58211	0.00981645
45312	0.412363	0.0105975	0.415113	0.0105975
55312	0.32072	0.0108843	0.326125	0.0108843
11412	0.779756	0.00705448	0.792165	0.00705448
21412	0.739541	0.00805651	0.7502	0.00805651
31412	0.729377	0.00792794	0.739593	0.00792794
41412	0.569345	0.0116389	0.572596	0.0116389
51412	0.477702	0.0110496	0.483607	0.0110496
12412	0.741426	0.00806889	0.752167	0.00806889
22412	0.701211	0.010943	0.710201	0.010943
32412	0.691047	0.00935756	0.699594	0.00935756
42412	0.531015	0.0123485	0.532597	0.0123485
52412	0.439372	0.0120379	0.443609	0.0120379
13412	0.731738	0.0078876	0.742057	0.0078876
23412	0.691523	0.00937903	0.700092	0.00937903
33412	0.681359	0.0102059	0.689485	0.0102059
43412	0.521327	0.0119514	0.522487	0.0119514
53412	0.429684	0.0113229	0.433499	0.0113229
14412	0.579208	0.0120324	0.582888	0.0120324
24412	0.538993	0.0125986	0.540922	0.0125986
34412	0.528829	0.011946	0.530315	0.011946
44412	0.368797	0.016156	0.363318	0.016156
54412	0.277154	0.0142502	0.27433	0.0142502
15412	0.491861	0.011864	0.498071	0.011864
25412	0.451645	0.0126199	0.456105	0.0126199
35412	0.441481	0.0115351	0.445498	0.0115351
45412	0.28145	0.0145784	0.278501	0.0145784
55412	0.189806	0.0135628	0.189512	0.0135628
11512	0.704787	0.00841145	0.719368	0.00841145
21512	0.664572	0.00984909	0.677403	0.00984909
31512	0.654408	0.00933817	0.666796	0.00933817
41512	0.494376	0.0111236	0.499799	0.0111236
51512	0.402733	0.011703	0.41081	0.011703
12512	0.666457	0.00990943	0.67937	0.00990943
22512	0.626242	0.0128043	0.637404	0.0128043
32512	0.616078	0.0111363	0.626797	0.0111363
42512	0.456046	0.0123636	0.4598	0.0123636
52512	0.364403	0.0131103	0.370811	0.0131103
13512	0.656769	0.00939746	0.66926	0.00939746
23512	0.616554	0.0111882	0.627294	0.0111882
33512	0.60639	0.0115594	0.616688	0.0115594
43512	0.446358	0.0116712	0.44969	0.0116712
53512	0.354715	0.0121731	0.360702	0.0121731
14512	0.504239	0.0119393	0.510091	0.0119393
24512	0.464024	0.0129461	0.468125	0.0129461
34512	0.45386	0.0119932	0.457518	0.0119932
44512	0.293828	0.0150356	0.290521	0.0150356
54512	0.202185	0.0139541	0.201533	0.0139541
15512	0.416892	0.0129354	0.425274	0.0129354
25512	0.376676	0.0140337	0.383308	0.0140337
35512	0.366512	0.0127668	0.372701	0.0127668
45512	0.206481	0.0143661	0.205704	0.0143661
55512	0.114837	0.0142968	0.116715	0.0142968
11122	0.902933	0.00548265	0.920704	0.00548265
21122	0.862718	0.00886633	0.878738	0.00886633
31122	0.852554	0.00738405	0.868132	0.00738405
41122	0.692522	0.00886716	0.701134	0.00886716
51122	0.600879	0.010502	0.612146	0.010502
12122	0.864603	0.00850448	0.880705	0.00850448
22122	0.824388	0.0126641	0.83874	0.0126641
32122	0.814223	0.0103035	0.828133	0.0103035
42122	0.654192	0.0110713	0.661136	0.0110713
52122	0.562549	0.0126505	0.572147	0.0126505
13122	0.854915	0.00686734	0.870596	0.00686734
23122	0.8147	0.0103113	0.82863	0.0103113
33122	0.804536	0.0100242	0.818023	0.0100242
43122	0.644504	0.0095211	0.651026	0.0095211
53122	0.552861	0.0110027	0.562038	0.0110027
14122	0.702385	0.00800018	0.711426	0.00800018
24122	0.66217	0.0105527	0.669461	0.0105527
34122	0.652006	0.00856209	0.658854	0.00856209
44122	0.491974	0.0119629	0.491857	0.0119629
54122	0.400331	0.0114104	0.402868	0.0114104
15122	0.615037	0.00957352	0.626609	0.00957352
25122	0.574822	0.0119821	0.584644	0.0119821
35122	0.564658	0.00976387	0.574037	0.00976387
45122	0.404627	0.0112382	0.40704	0.0112382
55122	0.312983	0.0119479	0.318051	0.0119479
11222	0.870035	0.00817116	0.886374	0.00817116
21222	0.82982	0.0123437	0.844408	0.0123437
31222	0.819656	0.0101411	0.833801	0.0101411
41222	0.659624	0.0109179	0.666804	0.0109179
51222	0.567981	0.0125078	0.577816	0.0125078
12222	0.831705	0.0120239	0.846375	0.0120239
22222	0.79149	0.0164217	0.80441	0.0164217
32222	0.781325	0.0137847	0.793803	0.0137847
42222	0.621294	0.0140956	0.626806	0.0140956
52222	0.529651	0.0155476	0.537817	0.0155476
13222	0.822017	0.00975909	0.836266	0.00975909
23222	0.781802	0.0138365	0.7943	0.0138365
33222	0.771637	0.012656	0.783693	0.012656
43222	0.611606	0.0119414	0.616696	0.0119414
53222	0.519963	0.0133635	0.527708	0.0133635
14222	0.669487	0.0102747	0.677096	0.0102747
24222	0.629272	0.013783	0.635131	0.013783
34222	0.619108	0.0112466	0.624524	0.0112466
44222	0.459076	0.0137311	0.457527	0.0137311
54222	0.367433	0.0134614	0.368538	0.0134614
15222	0.582139	0.0117919	0.592279	0.0117919
25222	0.541924	0.0151001	0.550313	0.0151001
35222	0.53176	0.0124233	0.539707	0.0124233
45222	0.371729	0.0133252	0.372709	0.0133252
55222	0.280085	0.0141278	0.283721	0.0141278
11322	0.86172	0.00685874	0.877697	0.00685874
21322	0.821505	0.0104225	0.835731	0.0104225
31322	0.811341	0.0100377	0.825125	0.0100377
41322	0.651309	0.00970886	0.658127	0.00970886
51322	0.559666	0.0112079	0.569139	0.0112079
12322	0.82339	0.010051	0.837698	0.010051
22322	0.783175	0.0142165	0.795733	0.0142165
32322	0.77301	0.0128103	0.785126	0.0128103
42322	0.612979	0.0122443	0.618129	0.0122443
52322	0.521336	0.0136774	0.52914	0.0136774
13322	0.813702	0.00954511	0.827589	0.00954511
23322	0.773487	0.0127791	0.785623	0.0127791
33322	0.763322	0.0131788	0.775016	0.0131788
43322	0.603291	0.0115435	0.608019	0.0115435
53322	0.511648	0.0127808	0.519031	0.0127808
14322	0.661172	0.00871384	0.66842	0.00871384
24322	0.620957	0.0116757	0.626454	0.0116757
34322	0.610793	0.0106998	0.615847	0.0106998
44322	0.450761	0.0123972	0.44885	0.0123972
54322	0.359118	0.0118519	0.359861	0.0118519
15322	0.573824	0.0100809	0.583602	0.0100809
25322	0.533609	0.0129065	0.541637	0.0129065
35322	0.523445	0.0115997	0.53103	0.0115997
45322	0.363414	0.0116156	0.364033	0.0116156
55322	0.27177	0.0122909	0.275044	0.0122909
11422	0.730806	0.00824295	0.741085	0.00824295
21422	0.690591	0.0114902	0.699119	0.0114902
31422	0.680427	0.00990996	0.688512	0.00990996
41422	0.520396	0.0124597	0.521515	0.0124597
51422	0.428752	0.0123229	0.432527	0.0123229
12422	0.692476	0.0113369	0.701086	0.0113369
22422	0.652261	0.015235	0.659121	0.015235
32422	0.642097	0.0129675	0.648514	0.0129675
42422	0.482065	0.014748	0.481517	0.014748
52422	0.390422	0.0148294	0.392528	0.0148294
13422	0.682788	0.00974844	0.690977	0.00974844
23422	0.642573	0.0130277	0.649011	0.0130277
33422	0.632409	0.0124158	0.638404	0.0124158
43422	0.472377	0.0133137	0.471407	0.0133137
53422	0.380734	0.013138	0.382418	0.013138
14422	0.530258	0.0125374	0.531807	0.0125374
24422	0.490043	0.0148347	0.489842	0.0148347
34422	0.479879	0.0131259	0.479235	0.0131259
44422	0.319848	0.0165839	0.312238	0.0165839
54422	0.228204	0.0150684	0.223249	0.0150684
15422	0.442911	0.0126287	0.44699	0.0126287
25422	0.402696	0.0150642	0.405024	0.0150642
35422	0.392531	0.0129985	0.394418	0.0129985
45422	0.2325	0.0152598	0.22742	0.0152598
55422	0.140856	0.0146376	0.138432	0.0146376
11522	0.655837	0.010151	0.668288	0.010151
21522	0.615622	0.0133504	0.626322	0.0133504
31522	0.605458	0.0116904	0.615715	0.0116904
41522	0.445427	0.0125549	0.448718	0.0125549
51522	0.353783	0.0134473	0.35973	0.0134473
12522	0.617507	0.0132561	0.628289	0.0132561
22522	0.577292	0.0170416	0.586323	0.0170416
32522	0.567128	0.0147891	0.575717	0.0147891
42522	0.407096	0.0152311	0.408719	0.0152311
52522	0.315453	0.0161551	0.319731	0.0161551
13522	0.607819	0.0116292	0.61818	0.0116292
23522	0.567604	0.0148674	0.576214	0.0148674
33522	0.55744	0.0140614	0.565607	0.0140614
43522	0.397409	0.0135921	0.39861	0.0135921
53522	0.305765	0.0143768	0.309621	0.0143768
14522	0.455289	0.0130024	0.45901	0.0130024
24522	0.415074	0.0155903	0.417045	0.0155903
34522	0.40491	0.0136941	0.406438	0.0136941
44522	0.244879	0.0159432	0.23944	0.0159432
54522	0.153235	0.0152582	0.150452	0.0152582
15522	0.367942	0.0141479	0.374193	0.0141479
25522	0.327727	0.0166949	0.332227	0.0166949
35522	0.317562	0.0145946	0.32162	0.0145946
45522	0.157531	0.0155185	0.154623	0.0155185
55522	0.0658875	0.015774	0.0656347	0.015774
11132	0.890561	0.00670958	0.907793	0.00670958
21132	0.850346	0.00750892	0.865828	0.00750892
31132	0.840182	0.00978203	0.855221	0.00978203
41132	0.68015	0.00920898	0.688224	0.00920898
51132	0.588507	0.0104008	0.599235	0.0104008
12132	0.852231	0.00707209	0.867795	0.00707209
22132	0.812016	0.010044	0.825829	0.010044
32132	0.801851	0.0104907	0.815222	0.0104907
42132	0.64182	0.00956466	0.648225	0.00956466
52132	0.550177	0.010984	0.559237	0.010984
13132	0.842543	0.00920356	0.857685	0.00920356
23132	0.802328	0.0103287	0.81572	0.0103287
33132	0.792163	0.0128154	0.805113	0.0128154
43132	0.632132	0.0109278	0.638116	0.0109278
53132	0.540489	0.0118966	0.549127	0.0118966
14132	0.690013	0.00780319	0.698516	0.00780319
24132	0.649798	0.00842965	0.65655	0.00842965
34132	0.639634	0.00981842	0.645943	0.00981842
44132	0.479602	0.011455	0.478946	0.011455
54132	0.387959	0.0104886	0.389958	0.0104886
15132	0.602665	0.00873948	0.613699	0.00873948
25132	0.56245	0.00954514	0.571733	0.00954514
35132	0.552286	0.0103085	0.561126	0.0103085
45132	0.392255	0.0101116	0.394129	0.0101116
55132	0.300611	0.0105073	0.30514	0.0105073
11232	0.857663	0.00708905	0.873463	0.00708905
21232	0.817448	0.00993309	0.831498	0.00993309
31232	0.807283	0.0106082	0.820891	0.0106082
41232	0.647252	0.00969057	0.653894	0.00969057
51232	0.555609	0.0110841	0.564905	0.0110841
12232	0.819333	0.00952834	0.833465	0.00952834
22232	0.779118	0.0133679	0.791499	0.0133679
32232	0.768953	0.0127451	0.780892	0.0127451
42232	0.608922	0.0116672	0.613895	0.0116672
52232	0.517279	0.0130717	0.524907	0.0130717
13232	0.809645	0.0100654	0.823355	0.0100654
23232	0.76943	0.0126623	0.781389	0.0126623
33232	0.759265	0.0138727	0.770783	0.0138727
43232	0.599234	0.0118275	0.603785	0.0118275
53232	0.507591	0.0129453	0.514797	0.0129453
14232	0.657115	0.00842523	0.664186	0.00842523
24232	0.6169	0.010872	0.62222	0.010872
34232	0.606735	0.0108676	0.611613	0.0108676
44232	0.446704	0.012049	0.444616	0.012049
54232	0.355061	0.011382	0.355628	0.011382
15232	0.569767	0.00960744	0.579369	0.00960744
25232	0.529552	0.0120034	0.537403	0.0120034
35232	0.519388	0.0115671	0.526796	0.0115671
45232	0.359356	0.0110469	0.359799	0.0110469
55232	0.267713	0.0116522	0.27081	0.0116522
11332	0.849348	0.00905861	0.864786	0.00905861
21332	0.809133	0.0103178	0.822821	0.0103178
31332	0.798968	0.012727	0.812214	0.012727
41332	0.638937	0.0109771	0.645217	0.0109771
51332	0.547294	0.0119816	0.556228	0.0119816
12332	0.811018	0.00993818	0.824788	0.00993818
22332	0.770803	0.0127541	0.782822	0.0127541
32332	0.760638	0.0137133	0.772215	0.0137133
42332	0.600607	0.0117851	0.605218	0.0117851
52332	0.508964	0.0129516	0.51623	0.0129516
13332	0.80133	0.0121947	0.814678	0.0121947
23332	0.761115	0.0135544	0.772713	0.0135544
33332	0.75095	0.0160464	0.762106	0.0160464
43332	0.590919	0.0134935	0.595109	0.0134935
53332	0.499276	0.0142785	0.50612	0.0142785
14332	0.6488	0.00963718	0.655509	0.00963718
24332	0.608585	0.010774	0.613543	0.010774
34332	0.59842	0.0125553	0.602936	0.0125553
44332	0.438389	0.0127222	0.435939	0.0127222
54332	0.346746	0.0118464	0.346951	0.0118464
15332	0.561452	0.0103154	0.570692	0.0103154
25332	0.521237	0.0115833	0.528726	0.0115833
35332	0.511073	0.0128663	0.518119	0.0128663
45332	0.351041	0.0114423	0.351122	0.0114423
55332	0.259398	0.0117803	0.262133	0.0117803
11432	0.718434	0.0083746	0.728174	0.0083746
21432	0.678219	0.0098502	0.686209	0.0098502
31432	0.668055	0.0112517	0.675602	0.0112517
41432	0.508023	0.0121923	0.508605	0.0121923
51432	0.41638	0.0117033	0.419616	0.0117033
12432	0.680104	0.00966656	0.688176	0.00966656
22432	0.639889	0.0126426	0.64621	0.0126426
32432	0.629725	0.0126206	0.635603	0.0126206
42432	0.469693	0.0131773	0.468606	0.0131773
52432	0.37805	0.0129519	0.379617	0.0129519
13432	0.670416	0.0109456	0.678066	0.0109456
23432	0.630201	0.0125423	0.6361	0.0125423
33432	0.620037	0.0143224	0.625494	0.0143224
43432	0.460005	0.0139013	0.458496	0.0139013
53432	0.368362	0.0134278	0.369508	0.0134278
14432	0.517886	0.011887	0.518897	0.011887
24432	0.477671	0.0129227	0.476931	0.0129227
34432	0.467507	0.0135133	0.466324	0.0135133
44432	0.307475	0.0158228	0.299327	0.0158228
54432	0.215832	0.0139319	0.210338	0.0139319
15432	0.430539	0.0114647	0.434079	0.0114647
25432	0.390323	0.012716	0.392114	0.012716
35432	0.380159	0.0129275	0.381507	0.0129275
45432	0.220128	0.0140013	0.21451	0.0140013
55432	0.128484	0.0130054	0.125521	0.0130054
11532	0.643465	0.00979828	0.655377	0.00979828
21532	0.60325	0.0115762	0.613411	0.0115762
31532	0.593086	0.0124834	0.602805	0.0124834
41532	0.433055	0.0119083	0.435807	0.0119083
51532	0.341411	0.0125188	0.346819	0.0125188
12532	0.605135	0.0114638	0.615379	0.0114638
22532	0.56492	0.0144541	0.573413	0.0144541
32532	0.554756	0.0141639	0.562806	0.0141639
42532	0.394724	0.0133754	0.395809	0.0133754
52532	0.303081	0.0141282	0.30682	0.0141282
13532	0.595447	0.0122796	0.605269	0.0122796
23532	0.555232	0.014121	0.563303	0.014121
33532	0.545068	0.0154751	0.552696	0.0154751
43532	0.385036	0.0138389	0.385699	0.0138389
53532	0.293393	0.0143237	0.296711	0.0143237
14532	0.442917	0.0119981	0.4461	0.0119981
24532	0.402702	0.0134448	0.404134	0.0134448
34532	0.392538	0.0137341	0.393527	0.0137341
44532	0.232507	0.0148424	0.22653	0.0148424
54532	0.140863	0.0138069	0.137541	0.0138069
15532	0.35557	0.012763	0.361282	0.012763
25532	0.315354	0.0142921	0.319317	0.0142921
35532	0.30519	0.0142105	0.30871	0.0142105
45532	0.145159	0.0139562	0.141713	0.0139562
55532	0.0535154	0.0139454	0.0527242	0.0139454
11142	0.695771	0.00882879	0.704525	0.00882879
21142	0.655556	0.00827821	0.662559	0.00827821
31142	0.645392	0.00964919	0.651952	0.00964919
41142	0.485361	0.0126908	0.484955	0.0126908
51142	0.393717	0.0118081	0.395967	0.0118081
12142	0.657441	0.0079106	0.664526	0.0079106
22142	0.617226	0.009626	0.622561	0.009626
32142	0.607062	0.00933313	0.611954	0.00933313
42142	0.44703	0.0121395	0.444957	0.0121395
52142	0.355387	0.0114689	0.355968	0.0114689
13142	0.647753	0.00911885	0.654417	0.00911885
23142	0.607538	0.00918395	0.612451	0.00918395
33142	0.597374	0.0112771	0.601844	0.0112771
43142	0.437342	0.0126959	0.434847	0.0126959
53142	0.345699	0.0117602	0.345858	0.0117602
14142	0.495223	0.0114977	0.495247	0.0114977
24142	0.455008	0.0110264	0.453282	0.0110264
34142	0.444844	0.0114978	0.442675	0.0114978
44142	0.284813	0.0156795	0.275678	0.0156795
54142	0.193169	0.0134031	0.186689	0.0134031
15142	0.407876	0.0101795	0.41043	0.0101795
25142	0.36766	0.00987771	0.368464	0.00987771
35142	0.357496	0.00989937	0.357858	0.00989937
45142	0.197465	0.0131457	0.19086	0.0131457
55142	0.105821	0.0116607	0.101872	0.0116607
11242	0.662873	0.00801206	0.670195	0.00801206
21242	0.622658	0.00958231	0.628229	0.00958231
31242	0.612494	0.00953739	0.617622	0.00953739
41242	0.452462	0.012295	0.450625	0.012295
51242	0.360819	0.0116241	0.361637	0.0116241
12242	0.624543	0.00918486	0.630196	0.00918486
22242	0.584328	0.0123081	0.58823	0.0123081
32242	0.574164	0.0109773	0.577624	0.0109773
42242	0.414132	0.0131536	0.410626	0.0131536
52242	0.322489	0.0127579	0.321638	0.0127579
13242	0.614855	0.00898721	0.620087	0.00898721
23242	0.57464	0.0109091	0.578121	0.0109091
33242	0.564476	0.011679	0.567514	0.011679
43242	0.404444	0.0127542	0.400517	0.0127542
53242	0.312801	0.0120567	0.311528	0.0120567
14242	0.462325	0.0111041	0.460917	0.0111041
24242	0.42211	0.0122365	0.418952	0.0122365
34242	0.411946	0.0116152	0.408345	0.0116152
44242	0.251914	0.0155183	0.241347	0.0155183
54242	0.160271	0.0134236	0.152359	0.0134236
15242	0.374978	0.0100278	0.3761	0.0100278
25242	0.334762	0.0114695	0.334134	0.0114695
35242	0.324598	0.0103219	0.323527	0.0103219
45242	0.164567	0.0131761	0.15653	0.0131761
55242	0.0729233	0.0119311	0.0675417	0.0119311
11342	0.654558	0.00913678	0.661518	0.00913678
21342	0.614343	0.00933251	0.619552	0.00933251
31342	0.604179	0.0113087	0.608945	0.0113087
41342	0.444147	0.0128547	0.441948	0.0128547
51342	0.352504	0.011971	0.35296	0.011971
12342	0.616228	0.00893441	0.621519	0.00893441
22342	0.576013	0.0110878	0.579554	0.0110878
32342	0.565849	0.0115586	0.568947	0.0115586
42342	0.405817	0.0127776	0.40195	0.0127776
52342	0.314174	0.0121294	0.312961	0.0121294
13342	0.60654	0.0107542	0.61141	0.0107542
23342	0.566325	0.0113964	0.569444	0.0113964
33342	0.556161	0.0137448	0.558837	0.0137448
43342	0.396129	0.0138686	0.39184	0.0138686
53342	0.304486	0.0130054	0.302851	0.0130054
14342	0.45401	0.0115185	0.45224	0.0115185
24342	0.413795	0.011623	0.410275	0.011623
34342	0.403631	0.012725	0.399668	0.012725
44342	0.243599	0.0156518	0.232671	0.0156518
54342	0.151956	0.013359	0.143682	0.013359
15342	0.366663	0.0101067	0.367423	0.0101067
25342	0.326447	0.0104463	0.325457	0.0104463
35342	0.316283	0.0112146	0.314851	0.0112146
45342	0.156252	0.0130378	0.147853	0.0130378
55342	0.0646084	0.0115254	0.0588648	0.0115254
11442	0.523645	0.0113055	0.524906	0.0113055
21442	0.483429	0.0115725	0.48294	0.0115725
31442	0.473265	0.0121972	0.472333	0.0121972
41442	0.313234	0.0158005	0.305336	0.0158005
51442	0.22159	0.0138915	0.216347	0.0138915
12442	0.485314	0.0114349	0.484907	0.0114349
22442	0.445099	0.0132803	0.442941	0.0132803
32442	0.434935	0.0126919	0.432335	0.0126919
42442	0.274904	0.0159461	0.265337	0.0159461
52442	0.18326	0.0142616	0.176349	0.0142616
13442	0.475627	0.0119585	0.474797	0.0119585
23442	0.435411	0.0126382	0.432832	0.0126382
33442	0.425247	0.013886	0.422225	0.013886
43442	0.265216	0.0161174	0.255228	0.0161174
53442	0.173572	0.0142067	0.166239	0.0142067
14442	0.323097	0.0154065	0.315628	0.0154065
24442	0.282881	0.0155651	0.273662	0.0155651
34442	0.272717	0.0155935	0.263056	0.0155935
44442	0.112686	0.0197419	0.0960584	0.0197419
54442	0.0210424	0.0169848	0.00706987	0.0169848
15442	0.235749	0.0135438	0.230811	0.0135438
25442	0.195534	0.0138892	0.188845	0.0138892
35442	0.185369	0.0135502	0.178238	0.0135502
45442	0.0253381	0.0170691	0.0112411	0.0170691
55442	-0.0663053	0.0148142	-0.0777474	0.0148142
11542	0.448676	0.0105973	0.452109	0.0105973
21542	0.40846	0.0113807	0.410143	0.0113807
31542	0.398296	0.0116885	0.399536	0.0116885
41542	0.238265	0.0141925	0.232539	0.0141925
51542	0.146621	0.0130897	0.14355	0.0130897
12542	0.410346	0.0112848	0.41211	0.0112848
22542	0.37013	0.0135671	0.370144	0.0135671
32542	0.359966	0.01269	0.359537	0.01269
42542	0.199935	0.01477	0.19254	0.01477
52542	0.108291	0.0139234	0.103552	0.0139234
13542	0.400658	0.0115154	0.402	0.0115154
23542	0.360442	0.0126662	0.360035	0.0126662
33542	0.350278	0.0136302	0.349428	0.0136302
43542	0.190247	0.0147191	0.182431	0.0147191
53542	0.0986033	0.0136128	0.0934421	0.0136128
14542	0.248128	0.0140936	0.242831	0.0140936
24542	0.207912	0.014651	0.200865	0.014651
34542	0.197748	0.0144149	0.190258	0.0144149
44542	0.0377168	0.0178408	0.0232613	0.0178408
54542	-0.0539266	0.0156086	-0.0657272	0.0156086
15542	0.16078	0.0131721	0.158014	0.0131721
25542	0.120565	0.0139316	0.116048	0.0139316
35542	0.1104	0.0133056	0.105441	0.0133056
45542	-0.0496309	0.0157705	-0.061556	0.0157705
55542	-0.141274	0.0142622	-0.150544	0.0142622
11152	0.584223	0.0103454	0.596208	0.0103454
21152	0.544008	0.0100064	0.554243	0.0100064
31152	0.533844	0.011265	0.543636	0.011265
41152	0.373812	0.0114919	0.376638	0.0114919
51152	0.282169	0.0124045	0.28765	0.0124045
12152	0.545893	0.00961119	0.55621	0.00961119
22152	0.505678	0.0111793	0.514244	0.0111793
32152	0.495514	0.0110281	0.503637	0.0110281
42152	0.335482	0.010913	0.33664	0.010913
52152	0.243839	0.0121118	0.247651	0.0121118
13152	0.536205	0.0107046	0.5461	0.0107046
23152	0.49599	0.0108766	0.504134	0.0108766
33152	0.485826	0.0127798	0.493527	0.0127798
43152	0.325794	0.0115996	0.32653	0.0115996
53152	0.234151	0.012454	0.237542	0.012454
14152	0.383675	0.00985796	0.386931	0.00985796
24152	0.34346	0.00943845	0.344965	0.00943845
34152	0.333296	0.0100943	0.334358	0.0100943
44152	0.173264	0.0123595	0.167361	0.0123595
54152	0.081621	0.0114012	0.0783724	0.0114012
15152	0.296328	0.0103014	0.302113	0.0103014
25152	0.256112	0.0101285	0.260148	0.0101285
35152	0.245948	0.0102571	0.249541	0.0102571
45152	0.0859167	0.0108274	0.0825437	0.0108274
55152	-0.00572675	0.011128	-0.0064448	0.011128
11252	0.551325	0.0097241	0.561878	0.0097241
21252	0.51111	0.0111672	0.519912	0.0111672
31252	0.500946	0.0112268	0.509306	0.0112268
41252	0.340914	0.0111113	0.342308	0.0111113
51252	0.249271	0.0122821	0.25332	0.0122821
12252	0.512995	0.0107445	0.52188	0.0107445
22252	0.47278	0.0136049	0.479914	0.0136049
32252	0.462615	0.0125019	0.469307	0.0125019
42252	0.302584	0.0120842	0.30231	0.0120842
52252	0.210941	0.013387	0.213321	0.013387
13252	0.503307	0.0106533	0.51177	0.0106533
23252	0.463092	0.0124197	0.469804	0.0124197
33252	0.452928	0.0131846	0.459197	0.0131846
43252	0.292896	0.0117183	0.2922	0.0117183
53252	0.201253	0.0127847	0.203212	0.0127847
14252	0.350777	0.0094641	0.352601	0.0094641
24252	0.310562	0.0108867	0.310635	0.0108867
34252	0.300398	0.0102905	0.300028	0.0102905
44252	0.140366	0.012207	0.133031	0.012207
54252	0.0487229	0.0114814	0.0440424	0.0114814
15252	0.263429	0.0102146	0.267783	0.0102146
25252	0.223214	0.011741	0.225818	0.011741
35252	0.21305	0.0107255	0.215211	0.0107255
45252	0.0530186	0.0109233	0.0482136	0.0109233
55252	-0.0386248	0.0114672	-0.0407749	0.0114672
11352	0.54301	0.0107448	0.553201	0.0107448
21352	0.502795	0.0110266	0.511236	0.0110266
31352	0.492631	0.0128285	0.500629	0.0128285
41352	0.332599	0.0117957	0.333632	0.0117957
51352	0.240956	0.0126742	0.244643	0.0126742
12352	0.50468	0.0106071	0.513203	0.0106071
22352	0.464465	0.0125757	0.471237	0.0125757
32352	0.4543	0.0130768	0.46063	0.0130768
42352	0.294269	0.0117423	0.293633	0.0117423
52352	0.202626	0.012852	0.204644	0.012852
13352	0.494992	0.0122466	0.503093	0.0122466
23352	0.454777	0.0129122	0.461127	0.0129122
33352	0.444613	0.0150983	0.450521	0.0150983
43352	0.284581	0.0129843	0.283523	0.0129843
53352	0.192938	0.0137416	0.194535	0.0137416
14352	0.342462	0.0100274	0.343924	0.0100274
24352	0.302247	0.0102707	0.301958	0.0102707
34352	0.292083	0.0115979	0.291351	0.0115979
44352	0.132051	0.012441	0.124354	0.012441
54352	0.0404079	0.0114759	0.0353655	0.0114759
15352	0.255114	0.0103697	0.259106	0.0103697
25352	0.214899	0.0108182	0.217141	0.0108182
35352	0.204735	0.0116563	0.206534	0.0116563
45352	0.0447036	0.0108305	0.0395367	0.0108305
55352	-0.0469398	0.0111169	-0.0494518	0.0111169
11452	0.412096	0.0102708	0.416589	0.0102708
21452	0.371881	0.0106826	0.374623	0.0106826
31452	0.361717	0.0114525	0.364017	0.0114525
41452	0.201686	0.0130099	0.197019	0.0130099
51452	0.110042	0.0124904	0.108031	0.0124904
12452	0.373766	0.0104475	0.37659	0.0104475
22452	0.333551	0.0125411	0.334625	0.0125411
32452	0.323387	0.0120079	0.324018	0.0120079
42452	0.163355	0.0132136	0.157021	0.0132136
52452	0.0717121	0.0129286	0.0680322	0.0129286
13452	0.364078	0.0110922	0.366481	0.0110922
23452	0.323863	0.0119279	0.324515	0.0119279
33452	0.313699	0.0133254	0.313908	0.0133254
43452	0.153668	0.0134807	0.146911	0.0134807
53452	0.0620241	0.0129315	0.0579226	0.0129315
14452	0.211548	0.0122857	0.207311	0.0122857
24452	0.171333	0.0125845	0.165346	0.0125845
34452	0.161169	0.0127063	0.154739	0.0127063
44452	0.00113762	0.0156603	-0.0122582	0.0156603
54452	-0.0905058	0.0136902	-0.101247	0.0136902
15452	0.124201	0.0115985	0.122494	0.0115985
25452	0.0839856	0.0121046	0.0805286	0.0121046
35452	0.0738212	0.0118073	0.0699217	0.0118073
45452	-0.0862101	0.0135784	-0.0970755	0.0135784
55452	-0.177853	0.0124866	-0.186064	0.0124866
11552	0.337128	0.0111241	0.343792	0.0111241
21552	0.296912	0.0119785	0.301826	0.0119785
31552	0.286748	0.0123604	0.291219	0.0123604
41552	0.126717	0.0124418	0.124222	0.0124418
51552	0.0350732	0.0129672	0.0352337	0.0129672
12552	0.298797	0.0118114	0.303793	0.0118114
22552	0.258582	0.0140979	0.261828	0.0140979
32552	0.248418	0.0133384	0.251221	0.0133384
42552	0.0883865	0.0131241	0.0842236	0.0131241
52552	-0.00325689	0.0138343	-0.00476487	0.0138343
13552	0.289109	0.0120998	0.293684	0.0120998
23552	0.248894	0.0132949	0.251718	0.0132949
33552	0.23873	0.0142932	0.241111	0.0142932
43552	0.0786986	0.0131294	0.074114	0.0131294
53552	-0.0129448	0.013582	-0.0148745	0.013582
14552	0.13658	0.0120821	0.134514	0.0120821
24552	0.0963643	0.0128265	0.0925487	0.0128265
34552	0.0861999	0.0126432	0.0819419	0.0126432
44552	-0.0738313	0.0144072	-0.0850553	0.0144072
54552	-0.165475	0.0132793	-0.174044	0.0132793
15552	0.0492318	0.0125844	0.0496971	0.0125844
25552	0.00901662	0.0134711	0.00773145	0.0134711
35552	-0.00114775	0.0129079	-0.00287536	0.0129079
45552	-0.161179	0.0132475	-0.169873	0.0132475
55552	-0.252822	0.013177	-0.258861	0.013177
11113	0.945049	0.00684602	0.964653	0.00684602
21113	0.904834	0.00509624	0.922687	0.00509624
31113	0.894669	0.00826413	0.912081	0.00826413
41113	0.734638	0.00941316	0.745083	0.00941316
51113	0.642995	0.0102938	0.656095	0.0102938
12113	0.906719	0.0048437	0.924655	0.0048437
22113	0.866504	0.00648585	0.882689	0.00648585
32113	0.856339	0.00736612	0.872082	0.00736612
42113	0.696308	0.00817816	0.705085	0.00817816
52113	0.604665	0.00948846	0.616096	0.00948846
13113	0.897031	0.00785179	0.914545	0.00785179
23113	0.856816	0.00716692	0.872579	0.00716692
33113	0.846651	0.0105801	0.861972	0.0105801
43113	0.68662	0.00991534	0.694975	0.00991534
53113	0.594977	0.0106963	0.605987	0.0106963
14113	0.744501	0.00876988	0.755376	0.00876988
24113	0.704286	0.00740394	0.71341	0.00740394
34113	0.694121	0.00912034	0.702803	0.00912034
44113	0.53409	0.0122144	0.535806	0.0122144
54113	0.442447	0.0110439	0.446817	0.0110439
15113	0.657153	0.00959428	0.670558	0.00959428
25113	0.616938	0.00863248	0.628593	0.00863248
35113	0.606774	0.00962778	0.617986	0.00962778
45113	0.446742	0.0109484	0.450989	0.0109484
55113	0.355099	0.0110459	0.362	0.0110459
11213	0.912151	0.00483559	0.930323	0.00483559
21213	0.871936	0.00628753	0.888357	0.00628753
31213	0.861771	0.00751135	0.877751	0.00751135
41213	0.70174	0.00830591	0.710753	0.00830591
51213	0.610097	0.00958756	0.621765	0.00958756
12213	0.873821	0.00595944	0.890325	0.00595944
22213	0.833606	0.00954809	0.848359	0.00954809
32213	0.823441	0.00882739	0.837752	0.00882739
42213	0.66341	0.00909954	0.670755	0.00909954
52213	0.571767	0.0105607	0.581766	0.0105607
13213	0.864133	0.00703823	0.880215	0.00703823
23213	0.823918	0.00873482	0.838249	0.00873482
33213	0.813753	0.0105562	0.827642	0.0105562
43213	0.653722	0.0094903	0.660645	0.0094903
53213	0.562079	0.0105708	0.571657	0.0105708
14213	0.711603	0.00763441	0.721046	0.00763441
24213	0.671388	0.00855792	0.67908	0.00855792
34213	0.661223	0.00872717	0.668473	0.00872717
44213	0.501192	0.0115944	0.501476	0.0115944
54213	0.409549	0.01062	0.412487	0.01062
15213	0.624255	0.00890243	0.636228	0.00890243
25213	0.58404	0.00993827	0.594263	0.00993827
35213	0.573876	0.00956592	0.583656	0.00956592
45213	0.413844	0.0105327	0.416659	0.0105327
55213	0.322201	0.0108931	0.32767	0.0108931
11313	0.903836	0.00755321	0.921646	0.00755321
21313	0.863621	0.00701346	0.87968	0.00701346
31313	0.853456	0.0103791	0.869074	0.0103791
41313	0.693425	0.00987132	0.702076	0.00987132
51313	0.601782	0.0106998	0.613088	0.0106998
12313	0.865506	0.00673479	0.881648	0.00673479
22313	0.825291	0.00877474	0.839682	0.00877474
32313	0.815126	0.0102666	0.829075	0.0102666
42313	0.655095	0.00935045	0.662078	0.00935045
52313	0.563452	0.0105008	0.573089	0.0105008
13313	0.855818	0.00993979	0.871538	0.00993979
23313	0.815603	0.0100771	0.829572	0.0100771
33313	0.805438	0.0133542	0.818965	0.0133542
43313	0.645407	0.0115808	0.651968	0.0115808
53313	0.553764	0.0122433	0.56298	0.0122433
14313	0.703288	0.00905755	0.712369	0.00905755
24313	0.663073	0.00854287	0.670403	0.00854287
34313	0.652908	0.0108424	0.659796	0.0108424
44313	0.492877	0.0123682	0.492799	0.0123682
54313	0.401234	0.0111998	0.40381	0.0111998
15313	0.61594	0.00975822	0.627551	0.00975822
25313	0.575725	0.00952504	0.585586	0.00952504
35313	0.565561	0.0111855	0.574979	0.0111855
45313	0.405529	0.0110315	0.407982	0.0110315
55313	0.313886	0.0111142	0.318993	0.0111142
11413	0.772922	0.00782015	0.785034	0.00782015
21413	0.732707	0.00746898	0.743068	0.00746898
31413	0.722543	0.00940101	0.732461	0.00940101
41413	0.562511	0.0119006	0.565464	0.0119006
51413	0.470868	0.0111321	0.476476	0.0111321
12413	0.734592	0.00748736	0.745035	0.00748736
22413	0.694377	0.00949698	0.70307	0.00949698
32413	0.684213	0.00962576	0.692463	0.00962576
42413	0.524181	0.0117564	0.525466	0.0117564
52413	0.432538	0.0112386	0.436477	0.0112386
13413	0.724904	0.00926943	0.734926	0.00926943
23413	0.684689	0.00954796	0.69296	0.00954796
33413	0.674525	0.0119166	0.682353	0.0119166
43413	0.514493	0.012701	0.515356	0.012701
53413	0.42285	0.0119314	0.426368	0.0119314
14413	0.572374	0.0121035	0.575756	0.0121035
24413	0.532159	0.0118291	0.533791	0.0118291
34413	0.521995	0.012592	0.523184	0.012592
44413	0.361963	0.0160469	0.356187	0.0160469
54413	0.27032	0.0139723	0.267198	0.0139723
15413	0.485027	0.011674	0.490939	0.011674
25413	0.444811	0.0115879	0.448973	0.0115879
35413	0.434647	0.0119466	0.438367	0.0119466
45413	0.274616	0.0142419	0.271369	0.0142419
55413	0.182972	0.0130353	0.182381	0.0130353
11513	0.697953	0.00875896	0.712237	0.00875896
21513	0.657738	0.00908079	0.670271	0.00908079
31513	0.647574	0.0103589	0.659664	0.0103589
41513	0.487542	0.0111568	0.492667	0.0111568
51513	0.395899	0.0115485	0.403679	0.0115485
12513	0.659623	0.00915032	0.672238	0.00915032
22513	0.619408	0.0113565	0.630273	0.0113565
32513	0.609244	0.0111214	0.619666	0.0111214
42513	0.449212	0.0115397	0.452669	0.0115397
52513	0.357569	0.0121595	0.36368	0.0121595
13513	0.649935	0.0103246	0.662129	0.0103246
23513	0.60972	0.0110883	0.620163	0.0110883
33513	0.599556	0.0128858	0.609556	0.0128858
43513	0.439524	0.0122179	0.442559	0.0122179
53513	0.347881	0.0125265	0.35357	0.0125265
14513	0.497405	0.011783	0.502959	0.011783
24513	0.45719	0.0119743	0.460994	0.0119743
34513	0.447026	0.0124205	0.450387	0.0124205
44513	0.286994	0.0147355	0.28339	0.0147355
54513	0.195351	0.0134704	0.194401	0.0134704
15513	0.410058	0.0125471	0.418142	0.0125471
25513	0.369842	0.0129049	0.376176	0.0129049
35513	0.359678	0.0129319	0.36557	0.0129319
45513	0.199647	0.0138298	0.198572	0.0138298
55513	0.108003	0.0135995	0.109584	0.0135995
11123	0.896099	0.00533221	0.913573	0.00533221
21123	0.855884	0.00751492	0.871607	0.00751492
31123	0.84572	0.00818749	0.861	0.00818749
41123	0.685688	0.00847189	0.694003	0.00847189
51123	0.594045	0.00995523	0.605014	0.00995523
12123	0.857769	0.00708968	0.873574	0.00708968
22123	0.817554	0.0108539	0.831608	0.0108539
32123	0.807389	0.00991144	0.821002	0.00991144
42123	0.647358	0.00976143	0.654004	0.00976143
52123	0.555715	0.011332	0.565016	0.011332
13123	0.848081	0.00760607	0.863464	0.00760607
23123	0.807866	0.00982365	0.821499	0.00982365
33123	0.797702	0.0111944	0.810892	0.0111944
43123	0.63767	0.0098039	0.643895	0.0098039
53123	0.546027	0.0110541	0.554906	0.0110541
14123	0.695551	0.0072596	0.704295	0.0072596
24123	0.655336	0.00891891	0.662329	0.00891891
34123	0.645172	0.00872618	0.651723	0.00872618
44123	0.48514	0.0112509	0.484725	0.0112509
54123	0.393497	0.0104565	0.395737	0.0104565
15123	0.608203	0.00861178	0.619478	0.00861178
25123	0.567988	0.0102747	0.577512	0.0102747
35123	0.557824	0.0095907	0.566905	0.0095907
45123	0.397793	0.0101775	0.399908	0.0101775
55123	0.306149	0.0107566	0.31092	0.0107566
11223	0.863201	0.00689607	0.879243	0.00689607
21223	0.822986	0.0106134	0.837277	0.0106134
31223	0.812822	0.00988777	0.82667	0.00988777
41223	0.65279	0.00973458	0.659673	0.00973458
51223	0.561147	0.0112993	0.570684	0.0112993
12223	0.824871	0.0102433	0.839244	0.0102433
22223	0.784656	0.0144746	0.797278	0.0144746
32223	0.774491	0.0128261	0.786671	0.0128261
42223	0.61446	0.0124021	0.619674	0.0124021
52223	0.522817	0.0138752	0.530686	0.0138752
13223	0.815183	0.00939929	0.829134	0.00939929
23223	0.774968	0.012808	0.787169	0.012808
33223	0.764803	0.012939	0.776562	0.012939
43223	0.604772	0.0114226	0.609565	0.0114226
53223	0.513129	0.0127331	0.520576	0.0127331
14223	0.662653	0.00875691	0.669965	0.00875691
24223	0.622438	0.0118564	0.627999	0.0118564
34223	0.612274	0.0105706	0.617392	0.0105706
44223	0.452242	0.012427	0.450395	0.012427
54223	0.360599	0.0119484	0.361407	0.0119484
15223	0.575305	0.0101968	0.585148	0.0101968
25223	0.53509	0.0131312	0.543182	0.0131312
35223	0.524926	0.01155	0.532575	0.01155
45223	0.364895	0.0117158	0.365578	0.0117158
55223	0.273251	0.0124483	0.27659	0.0124483
11323	0.854886	0.00747786	0.870566	0.00747786
21323	0.814671	0.00984854	0.8286	0.00984854
31323	0.804507	0.0111251	0.817993	0.0111251
41323	0.644475	0.00989501	0.650996	0.00989501
51323	0.552832	0.0111774	0.562007	0.0111774
12323	0.816556	0.00945846	0.830567	0.00945846
22323	0.776341	0.0130399	0.788601	0.0130399
32323	0.766176	0.0129106	0.777995	0.0129106
42323	0.606145	0.0115385	0.610997	0.0115385
52323	0.514502	0.0128823	0.522009	0.0128823
13323	0.806868	0.0105974	0.820457	0.0105974
23323	0.766653	0.0128058	0.778492	0.0128058
33323	0.756489	0.0144573	0.767885	0.0144573
43323	0.596457	0.0122156	0.600888	0.0122156
53323	0.504814	0.0132282	0.511899	0.0132282
14323	0.654338	0.00866793	0.661288	0.00866793
24323	0.614123	0.0107244	0.619322	0.0107244
34323	0.603959	0.011306	0.608716	0.011306
44323	0.443927	0.0121518	0.441718	0.0121518
54323	0.352284	0.0114066	0.35273	0.0114066
15323	0.56699	0.00972823	0.576471	0.00972823
25323	0.526775	0.0117932	0.534505	0.0117932
35323	0.516611	0.011904	0.523898	0.011904
45323	0.35658	0.0110775	0.356901	0.0110775
55323	0.264936	0.0115983	0.267913	0.0115983
11423	0.723972	0.00759834	0.733953	0.00759834
21423	0.683757	0.010065	0.691988	0.010065
31423	0.673593	0.0101061	0.681381	0.0101061
41423	0.513562	0.011824	0.514384	0.011824
51423	0.421918	0.0114928	0.425395	0.0114928
12423	0.685642	0.00989335	0.693955	0.00989335
22423	0.645427	0.0134517	0.651989	0.0134517
32423	0.635263	0.0123145	0.641382	0.0123145
42423	0.475231	0.0134771	0.474385	0.0134771
52423	0.383588	0.0134054	0.385397	0.0134054
13423	0.675954	0.00985593	0.683845	0.00985593
23423	0.635739	0.0123012	0.64188	0.0123012
33423	0.625575	0.0130537	0.631273	0.0130537
43423	0.465544	0.013196	0.464275	0.013196
53423	0.3739	0.0128513	0.375287	0.0128513
14423	0.523424	0.0117175	0.524676	0.0117175
24423	0.483209	0.0134042	0.48271	0.0134042
34423	0.473045	0.0129051	0.472103	0.0129051
44423	0.313014	0.0158086	0.305106	0.0158086
54423	0.22137	0.0140575	0.216118	0.0140575
15423	0.436077	0.0115503	0.439859	0.0115503
25423	0.395862	0.0134292	0.397893	0.0134292
35423	0.385697	0.012531	0.387286	0.012531
45423	0.225666	0.0141972	0.220289	0.0141972
55423	0.134022	0.0133652	0.1313	0.0133652
11523	0.649003	0.00934927	0.661156	0.00934927
21523	0.608788	0.0119201	0.619191	0.0119201
31523	0.598624	0.0116263	0.608584	0.0116263
41523	0.438593	0.0116946	0.441587	0.0116946
51523	0.346949	0.0124755	0.352598	0.0124755
12523	0.610673	0.0118176	0.621158	0.0118176
22523	0.570458	0.0152917	0.579192	0.0152917
32523	0.560294	0.0140281	0.568585	0.0140281
42523	0.400262	0.0138091	0.401588	0.0138091
52523	0.308619	0.0146752	0.3126	0.0146752
13523	0.600985	0.0114858	0.611048	0.0114858
23523	0.56077	0.0140433	0.569082	0.0140433
33523	0.550606	0.0144411	0.558476	0.0144411
43523	0.390575	0.0132742	0.391478	0.0132742
53523	0.298931	0.0139219	0.30249	0.0139219
14523	0.448455	0.0119898	0.451879	0.0119898
24523	0.40824	0.0140442	0.409913	0.0140442
34523	0.398076	0.01328	0.399306	0.01328
44523	0.238045	0.014955	0.232309	0.014955
54523	0.146401	0.0140694	0.143321	0.0140694
15523	0.361108	0.0129872	0.367062	0.0129872
25523	0.320893	0.015057	0.325096	0.015057
35523	0.310728	0.0139873	0.314489	0.0139873
45523	0.150697	0.0142864	0.147492	0.0142864
55523	0.0590535	0.014414	0.0585033	0.014414
11133	0.883727	0.0092898	0.900662	0.0092898
21133	0.843512	0.00878379	0.858696	0.00878379
31133	0.833348	0.0122926	0.84809	0.0122926
41133	0.673316	0.0109937	0.681092	0.0109937
51133	0.581673	0.0118279	0.592104	0.0118279
12133	0.845397	0.00841789	0.860663	0.00841789
22133	0.805182	0.0100606	0.818698	0.0100606
32133	0.795017	0.0120432	0.808091	0.0120432
42133	0.634986	0.010349	0.641094	0.010349
52133	0.543343	0.0114864	0.552105	0.0114864
13133	0.835709	0.0117604	0.850554	0.0117604
23133	0.795494	0.0118225	0.808588	0.0118225
33133	0.785329	0.0152307	0.797981	0.0152307
43133	0.625298	0.0129534	0.630984	0.0129534
53133	0.533655	0.0136225	0.541996	0.0136225
14133	0.683179	0.00961757	0.691384	0.00961757
24133	0.642964	0.00906399	0.649419	0.00906399
34133	0.6328	0.0119225	0.638812	0.0119225
44133	0.472768	0.0125538	0.471815	0.0125538
54133	0.381125	0.0114917	0.382826	0.0114917
15133	0.595831	0.0100895	0.606567	0.0100895
25133	0.555616	0.0097989	0.564602	0.0097989
35133	0.545452	0.0120757	0.553995	0.0120757
45133	0.385421	0.0110651	0.386997	0.0110651
55133	0.293777	0.0112368	0.298009	0.0112368
11233	0.850829	0.0085995	0.866332	0.0085995
21233	0.810614	0.0100922	0.824366	0.0100922
31233	0.800449	0.0122625	0.813759	0.0122625
41233	0.640418	0.0106008	0.646762	0.0106008
51233	0.548775	0.0117045	0.557774	0.0117045
12233	0.812499	0.00969797	0.826333	0.00969797
22233	0.772284	0.0127064	0.784368	0.0127064
32233	0.762119	0.0134104	0.773761	0.0134104
42233	0.602088	0.0115826	0.606764	0.0115826
52233	0.510445	0.0128285	0.517775	0.0128285
13233	0.802811	0.0117187	0.816224	0.0117187
23233	0.762596	0.0132605	0.774258	0.0132605
33233	0.752431	0.0155758	0.763651	0.0155758
43233	0.5924	0.0130644	0.596654	0.0130644
53233	0.500757	0.0139298	0.507666	0.0139298
14233	0.650281	0.00921993	0.657054	0.00921993
24233	0.610066	0.0105694	0.615089	0.0105694
34233	0.599901	0.012094	0.604482	0.012094
44233	0.43987	0.0124086	0.437485	0.0124086
54233	0.348227	0.0115765	0.348496	0.0115765
15233	0.562933	0.0100069	0.572237	0.0100069
25233	0.522718	0.0114632	0.530271	0.0114632
35233	0.512554	0.0124808	0.519665	0.0124808
45233	0.352523	0.0111643	0.352667	0.0111643
55233	0.260879	0.011578	0.263679	0.011578
11333	0.842514	0.0115691	0.857655	0.0115691
21333	0.802299	0.0117359	0.815689	0.0117359
31333	0.792135	0.0150963	0.805083	0.0150963
41333	0.632103	0.012925	0.638085	0.012925
51333	0.54046	0.0136303	0.549097	0.0136303
12333	0.804184	0.0114069	0.817656	0.0114069
22333	0.763969	0.0131722	0.775691	0.0131722
32333	0.753804	0.0152821	0.765084	0.0152821
42333	0.593773	0.0128457	0.598087	0.0128457
52333	0.50213	0.0137671	0.509098	0.0137671
13333	0.794496	0.0145882	0.807547	0.0145882
23333	0.754281	0.0150769	0.765581	0.0150769
33333	0.744116	0.0183229	0.754974	0.0183229
43333	0.584085	0.0155226	0.587977	0.0155226
53333	0.492442	0.0160755	0.498989	0.0160755
14333	0.641966	0.0116183	0.648377	0.0116183
24333	0.601751	0.0117336	0.606412	0.0117336
34333	0.591587	0.0146247	0.595805	0.0146247
44333	0.431555	0.0140975	0.428808	0.0140975
54333	0.339912	0.0131487	0.339819	0.0131487
15333	0.554618	0.0119302	0.56356	0.0119302
25333	0.514403	0.0122305	0.521595	0.0122305
35333	0.504239	0.0146834	0.510988	0.0146834
45333	0.344208	0.0127131	0.343991	0.0127131
55333	0.252564	0.0128506	0.255002	0.0128506
11433	0.7116	0.0101406	0.721043	0.0101406
21433	0.671385	0.0104505	0.679077	0.0104505
31433	0.661221	0.0131695	0.66847	0.0131695
41433	0.50119	0.0132711	0.501473	0.0132711
51433	0.409546	0.0126533	0.412485	0.0126533
12433	0.67327	0.0102813	0.681044	0.0102813
22433	0.633055	0.0123121	0.639079	0.0123121
32433	0.622891	0.0136264	0.628472	0.0136264
42433	0.462859	0.0134416	0.461475	0.0134416
52433	0.371216	0.0130559	0.372486	0.0130559
13433	0.663582	0.0128383	0.670935	0.0128383
23433	0.623367	0.0134838	0.628969	0.0134838
33433	0.613203	0.0162569	0.618362	0.0162569
43433	0.453171	0.0152655	0.451365	0.0152655
53433	0.361528	0.0146889	0.362376	0.0146889
14433	0.511052	0.0128189	0.511765	0.0128189
24433	0.470837	0.0130196	0.4698	0.0130196
34433	0.460673	0.0148246	0.459193	0.0148246
44433	0.300642	0.0163755	0.292196	0.0163755
54433	0.208998	0.014407	0.203207	0.014407
15433	0.423705	0.0121768	0.426948	0.0121768
25433	0.383489	0.0125707	0.384982	0.0125707
35433	0.373325	0.0140746	0.374376	0.0140746
45433	0.213294	0.0144098	0.207378	0.0144098
55433	0.12165	0.0132822	0.11839	0.0132822
11533	0.636631	0.0111032	0.648246	0.0111032
21533	0.596416	0.0118648	0.60628	0.0118648
31533	0.586252	0.0140445	0.595673	0.0140445
41533	0.426221	0.0128006	0.428676	0.0128006
51533	0.334577	0.0132074	0.339688	0.0132074
12533	0.598301	0.0117583	0.608247	0.0117583
22533	0.558086	0.0139732	0.566281	0.0139732
32533	0.547922	0.014886	0.555675	0.014886
42533	0.38789	0.0134355	0.388677	0.0134355
52533	0.296247	0.0140317	0.299689	0.0140317
13533	0.588613	0.013798	0.598138	0.013798
23533	0.548398	0.0147813	0.556172	0.0147813
33533	0.538234	0.0171234	0.545565	0.0171234
43533	0.378203	0.0150294	0.378568	0.0150294
53533	0.286559	0.0153364	0.289579	0.0153364
14533	0.436083	0.0127105	0.438968	0.0127105
24533	0.395868	0.0133361	0.397002	0.0133361
34533	0.385704	0.0148447	0.386396	0.0148447
44533	0.225673	0.0152536	0.219398	0.0152536
54533	0.134029	0.0140952	0.13041	0.0140952
15533	0.348736	0.0132026	0.354151	0.0132026
25533	0.308521	0.0139702	0.312185	0.0139702
35533	0.298356	0.0150828	0.301578	0.0150828
45533	0.138325	0.0141761	0.134581	0.0141761
55533	0.0466815	0.0140118	0.0455927	0.0140118
11143	0.688937	0.0104315	0.697393	0.0104315
21143	0.648722	0.00888185	0.655428	0.00888185
31143	0.638558	0.0117522	0.644821	0.0117522
41143	0.478527	0.0136638	0.477824	0.0136638
51143	0.386883	0.0126784	0.388835	0.0126784
12143	0.650607	0.00854467	0.657395	0.00854467
22143	0.610392	0.00908751	0.615429	0.00908751
32143	0.600228	0.0105678	0.604822	0.0105678
42143	0.440196	0.0123521	0.437825	0.0123521
52143	0.348553	0.011507	0.348837	0.011507
13143	0.640919	0.0112402	0.647285	0.0112402
23143	0.600704	0.0103452	0.605319	0.0103452
33143	0.59054	0.013583	0.594713	0.013583
43143	0.430508	0.014112	0.427715	0.014112
53143	0.338865	0.0131123	0.338727	0.0131123
14143	0.488389	0.0123852	0.488116	0.0123852
24143	0.448174	0.0110574	0.44615	0.0110574
34143	0.43801	0.0129434	0.435543	0.0129434
44143	0.277979	0.0161807	0.268546	0.0161807
54143	0.186335	0.0138304	0.179558	0.0138304
15143	0.401042	0.0108917	0.403299	0.0108917
25143	0.360827	0.00959507	0.361333	0.00959507
35143	0.350662	0.0112757	0.350726	0.0112757
45143	0.190631	0.0135126	0.183729	0.0135126
55143	0.0989874	0.011892	0.0947404	0.011892
11243	0.656039	0.00880213	0.663063	0.00880213
21243	0.615824	0.00919751	0.621098	0.00919751
31243	0.60566	0.0108804	0.610491	0.0108804
41243	0.445628	0.0126185	0.443494	0.0126185
51243	0.353985	0.0117833	0.354505	0.0117833
12243	0.617709	0.00878695	0.623065	0.00878695
22243	0.577494	0.0111278	0.581099	0.0111278
32243	0.56733	0.011291	0.570492	0.011291
42243	0.407298	0.0126744	0.403495	0.0126744
52243	0.315655	0.0120853	0.314507	0.0120853
13243	0.608021	0.0103137	0.612955	0.0103137
23243	0.567806	0.01114	0.570989	0.01114
33243	0.557642	0.0132718	0.560383	0.0132718
43243	0.39761	0.0135294	0.393385	0.0135294
53243	0.305967	0.0127046	0.304397	0.0127046
14243	0.455491	0.0112655	0.453786	0.0112655
24243	0.415276	0.0115253	0.41182	0.0115253
34243	0.405112	0.0123556	0.401213	0.0123556
44243	0.24508	0.0154661	0.234216	0.0154661
54243	0.153437	0.0132001	0.145228	0.0132001
15243	0.368144	0.00989837	0.368969	0.00989837
25243	0.327928	0.0104144	0.327003	0.0104144
35243	0.317764	0.0108674	0.316396	0.0108674
45243	0.157733	0.0128765	0.149399	0.0128765
55243	0.0660894	0.0114111	0.0604103	0.0114111
11343	0.647724	0.0111738	0.654386	0.0111738
21343	0.607509	0.0103903	0.612421	0.0103903
31343	0.597345	0.0135424	0.601814	0.0135424
41343	0.437314	0.0141911	0.434817	0.0141911
51343	0.34567	0.0132332	0.345828	0.0132332
12343	0.609394	0.010038	0.614388	0.010038
22343	0.569179	0.011107	0.572422	0.011107
32343	0.559015	0.0129875	0.561815	0.0129875
42343	0.398983	0.0133782	0.394818	0.0133782
52343	0.30734	0.0125897	0.30583	0.0125897
13343	0.599706	0.0130132	0.604278	0.0130132
23343	0.559491	0.0127694	0.562312	0.0127694
33343	0.549327	0.0160234	0.551706	0.0160234
43343	0.389295	0.0155178	0.384708	0.0155178
53343	0.297652	0.0146039	0.29572	0.0146039
14343	0.447176	0.0128209	0.445109	0.0128209
24343	0.406961	0.0120947	0.403143	0.0120947
34343	0.396797	0.0144139	0.392536	0.0144139
44343	0.236766	0.0164757	0.225539	0.0164757
54343	0.145122	0.0141634	0.136551	0.0141634
15343	0.359829	0.0112984	0.360292	0.0112984
25343	0.319613	0.0106829	0.318326	0.0106829
35343	0.309449	0.0128614	0.307719	0.0128614
45343	0.149418	0.0137938	0.140722	0.0137938
55343	0.0577744	0.0121978	0.0517334	0.0121978
11443	0.516811	0.0122515	0.517774	0.0122515
21443	0.476595	0.0116489	0.475809	0.0116489
31443	0.466431	0.0136086	0.465202	0.0136086
41443	0.3064	0.0163314	0.298204	0.0163314
51443	0.214756	0.0143422	0.209216	0.0143422
12443	0.478481	0.0115155	0.477776	0.0115155
22443	0.438265	0.0125581	0.43581	0.0125581
32443	0.428101	0.0133068	0.425203	0.0133068
42443	0.26807	0.0158399	0.258206	0.0158399
52443	0.176426	0.0139887	0.169217	0.0139887
13443	0.468793	0.013327	0.467666	0.013327
23443	0.428577	0.013184	0.4257	0.013184
33443	0.418413	0.0155423	0.415093	0.0155423
43443	0.258382	0.0170043	0.248096	0.0170043
53443	0.166738	0.0150624	0.159108	0.0150624
14443	0.316263	0.0158105	0.308497	0.0158105
24443	0.276047	0.0153092	0.266531	0.0153092
34443	0.265883	0.0164288	0.255924	0.0164288
44443	0.105852	0.019928	0.0889269	0.019928
54443	0.0142084	0.0170744	-6.15619e-05	0.0170744
15443	0.228915	0.0137789	0.223679	0.0137789
25443	0.1887	0.0133724	0.181714	0.0133724
35443	0.178535	0.0142887	0.171107	0.0142887
45443	0.0185041	0.0171041	0.00410971	0.0171041
55443	-0.0731393	0.014708	-0.0848788	0.014708
11543	0.441842	0.0113651	0.444977	0.0113651
21543	0.401627	0.0112193	0.403011	0.0112193
31543	0.391462	0.0129468	0.392405	0.0129468
41543	0.231431	0.0145966	0.225407	0.0145966
51543	0.139787	0.0133658	0.136419	0.0133658
12543	0.403512	0.0111254	0.404979	0.0111254
22543	0.363296	0.0126485	0.363013	0.0126485
32543	0.353132	0.0130997	0.352406	0.0130997
42543	0.193101	0.014469	0.185409	0.014469
52543	0.101457	0.0134436	0.0964203	0.0134436
13543	0.393824	0.0127195	0.394869	0.0127195
23543	0.353608	0.013004	0.352903	0.013004
33543	0.343444	0.0151361	0.342296	0.0151361
43543	0.183413	0.0155115	0.175299	0.0155115
53543	0.0917694	0.0143154	0.0863107	0.0143154
14543	0.241294	0.0143463	0.2357	0.0143463
24543	0.201079	0.0141891	0.193734	0.0141891
34543	0.190914	0.0151366	0.183127	0.0151366
44543	0.0308828	0.0178957	0.0161298	0.0178957
54543	-0.0607606	0.0155325	-0.0728587	0.0155325
15543	0.153946	0.01321	0.150882	0.01321
25543	0.113731	0.0132128	0.108917	0.0132128
35543	0.103566	0.0138628	0.0983098	0.0138628
45543	-0.0564648	0.0156359	-0.0686874	0.0156359
55543	-0.148108	0.0139589	-0.157676	0.0139589
11153	0.577389	0.0118396	0.589077	0.0118396
21153	0.537174	0.0106192	0.547111	0.0106192
31153	0.52701	0.013198	0.536504	0.013198
41153	0.366978	0.0126486	0.369507	0.0126486
51153	0.275335	0.0133216	0.280519	0.0133216
12153	0.539059	0.0102513	0.549078	0.0102513
22153	0.498844	0.010825	0.507113	0.010825
32153	0.48868	0.0121849	0.496506	0.0121849
42153	0.328648	0.0112508	0.329508	0.0112508
52153	0.237005	0.0122415	0.24052	0.0122415
13153	0.529371	0.0126514	0.538969	0.0126514
23153	0.489156	0.0119691	0.497003	0.0119691
33153	0.478992	0.0149308	0.486396	0.0149308
43153	0.31896	0.0132209	0.319399	0.0132209
53153	0.227317	0.0138207	0.23041	0.0138207
14153	0.376841	0.0109843	0.379799	0.0109843
24153	0.336626	0.00959426	0.337834	0.00959426
34153	0.326462	0.0118114	0.327227	0.0118114
44153	0.16643	0.0130769	0.16023	0.0130769
54153	0.074787	0.0119961	0.071241	0.0119961
15153	0.289494	0.0111089	0.294982	0.0111089
25153	0.249278	0.00996809	0.253016	0.00996809
35153	0.239114	0.011689	0.242409	0.011689
45153	0.0790827	0.0113708	0.0754123	0.0113708
55153	-0.0125607	0.01147	-0.0135762	0.01147
11253	0.544491	0.010494	0.554747	0.010494
21253	0.504276	0.0109435	0.512781	0.0109435
31253	0.494112	0.0124798	0.502174	0.0124798
41253	0.33408	0.0115672	0.335177	0.0115672
51253	0.242437	0.0125242	0.246188	0.0125242
12253	0.506161	0.0105155	0.514748	0.0105155
22253	0.465946	0.0126378	0.472782	0.0126378
32253	0.455781	0.0128673	0.462176	0.0128673
42253	0.29575	0.011659	0.295178	0.011659
52253	0.204107	0.0128368	0.20619	0.0128368
13253	0.496473	0.0118902	0.504639	0.0118902
23253	0.456258	0.0127131	0.462673	0.0127131
33253	0.446094	0.0146921	0.452066	0.0146921
43253	0.286062	0.0126482	0.285069	0.0126482
53253	0.194419	0.0134824	0.19608	0.0134824
14253	0.343943	0.00977039	0.345469	0.00977039
24253	0.303728	0.0101932	0.303503	0.0101932
34253	0.293564	0.0112215	0.292897	0.0112215
44253	0.133532	0.0122342	0.125899	0.0122342
54253	0.0418889	0.0113206	0.0369109	0.0113206
15253	0.256595	0.0102001	0.260652	0.0102001
25253	0.21638	0.0108187	0.218686	0.0108187
35253	0.206216	0.0113524	0.208079	0.0113524
45253	0.0461846	0.0106675	0.0410822	0.0106675
55253	-0.0454588	0.0110291	-0.0479063	0.0110291
11353	0.536176	0.0126136	0.54607	0.0126136
21353	0.495961	0.0120303	0.504104	0.0120303
31353	0.485797	0.0149118	0.493497	0.0149118
41353	0.325765	0.0133254	0.3265	0.0133254
51353	0.234122	0.0139546	0.237512	0.0139546
12353	0.497846	0.0116503	0.506071	0.0116503
22353	0.457631	0.0126829	0.464106	0.0126829
32353	0.447467	0.0144346	0.453499	0.0144346
42353	0.287435	0.0124849	0.286501	0.0124849
52353	0.195792	0.0133729	0.197513	0.0133729
13353	0.488158	0.014351	0.495962	0.014351
23353	0.447943	0.0142192	0.453996	0.0142192
33353	0.437779	0.0172647	0.443389	0.0172647
43353	0.277747	0.01481	0.276392	0.01481
53353	0.186104	0.0153377	0.187403	0.0153377
14353	0.335628	0.0115986	0.336792	0.0115986
24353	0.295413	0.0109067	0.294827	0.0109067
34353	0.285249	0.013514	0.28422	0.013514
44353	0.125217	0.0135473	0.117223	0.0135473
54353	0.0335739	0.0124947	0.028234	0.0124947
15353	0.248281	0.0116328	0.251975	0.0116328
25353	0.208065	0.0111496	0.210009	0.0111496
35353	0.197901	0.0133341	0.199403	0.0133341
45353	0.0378697	0.0118264	0.0324053	0.0118264
55353	-0.0537737	0.0119087	-0.0565832	0.0119087
11453	0.405263	0.0114042	0.409458	0.0114042
21453	0.365047	0.0108707	0.367492	0.0108707
31453	0.354883	0.0130331	0.356885	0.0130331
41453	0.194852	0.013733	0.189888	0.013733
51453	0.103208	0.0130774	0.100899	0.0130774
12453	0.366932	0.0106433	0.369459	0.0106433
22453	0.326717	0.0118701	0.327493	0.0118701
32453	0.316553	0.0127459	0.316887	0.0127459
42453	0.156522	0.013172	0.149889	0.013172
52453	0.0648781	0.0127169	0.0609008	0.0127169
13453	0.357244	0.012646	0.359349	0.012646
23453	0.317029	0.0125956	0.317384	0.0125956
33453	0.306865	0.0151192	0.306777	0.0151192
43453	0.146834	0.0146077	0.13978	0.0146077
53453	0.0551902	0.0139481	0.0507912	0.0139481
14453	0.204715	0.0128775	0.20018	0.0128775
24453	0.164499	0.0123592	0.158214	0.0123592
34453	0.154335	0.0138014	0.147608	0.0138014
44453	-0.00569635	0.0159659	-0.0193897	0.0159659
54453	-0.0973398	0.0138836	-0.108378	0.0138836
15453	0.117367	0.0119679	0.115363	0.0119679
25453	0.0771516	0.0116066	0.0733971	0.0116066
35453	0.0669872	0.0127379	0.0627903	0.0127379
45453	-0.093044	0.0137058	-0.104207	0.0137058
55453	-0.184687	0.0124523	-0.193195	0.0124523
11553	0.330294	0.0119537	0.336661	0.0119537
21553	0.290078	0.0119213	0.294695	0.0119213
31553	0.279914	0.0136404	0.284088	0.0136404
41553	0.119883	0.012989	0.117091	0.012989
51553	0.0282393	0.0133316	0.0281023	0.0133316
12553	0.291963	0.0117566	0.296662	0.0117566
22553	0.251748	0.0133022	0.254696	0.0133022
32553	0.241584	0.0138116	0.244089	0.0138116
42553	0.0815526	0.0128734	0.0770922	0.0128734
52553	-0.0100909	0.0134364	-0.0118963	0.0134364
13553	0.282275	0.0133367	0.286552	0.0133367
23553	0.24206	0.0137006	0.244587	0.0137006
33553	0.231896	0.0158081	0.23398	0.0158081
43553	0.0718646	0.0140931	0.0669826	0.0140931
53553	-0.0197788	0.0143658	-0.0220059	0.0143658
14553	0.129746	0.0124678	0.127383	0.0124678
24553	0.0895304	0.0123886	0.0854173	0.0123886
34553	0.079366	0.0135447	0.0748104	0.0135447
44553	-0.0806653	0.0145537	-0.0921868	0.0145537
54553	-0.172309	0.0132759	-0.181175	0.0132759
15553	0.0423978	0.0127141	0.0425657	0.0127141
25553	0.00218266	0.0128157	0.000600018	0.0128157
35553	-0.00798172	0.0135659	-0.0100068	0.0135659
45553	-0.168013	0.0131739	-0.177004	0.0131739
55553	-0.259656	0.0129367	-0.265993	0.0129367
11114	0.837453	0.00885844	0.852373	0.00885844
21114	0.797238	0.00681831	0.810408	0.00681831
31114	0.787073	0.00865361	0.799801	0.00865361
41114	0.627042	0.0117199	0.632804	0.0117199
51114	0.535399	0.0115894	0.543815	0.0115894
12114	0.799123	0.00679787	0.812375	0.00679787
22114	0.758908	0.00733004	0.770409	0.00733004
32114	0.748743	0.00721072	0.759802	0.00721072
42114	0.588712	0.0103333	0.592805	0.0103333
52114	0.497068	0.0104657	0.503817	0.0104657
13114	0.789435	0.00846107	0.802265	0.00846107
23114	0.74922	0.00708642	0.7603	0.00708642
33114	0.739055	0.00984186	0.749693	0.00984186
43114	0.579024	0.0111981	0.582696	0.0111981
53114	0.48738	0.0110045	0.493707	0.0110045
14114	0.636905	0.0115679	0.643096	0.0115679
24114	0.59669	0.0100318	0.60113	0.0100318
34114	0.586525	0.0107271	0.590523	0.0107271
44114	0.426494	0.0149412	0.423526	0.0149412
54114	0.334851	0.0132522	0.334538	0.0132522
15114	0.549557	0.0115532	0.558279	0.0115532
25114	0.509342	0.0102401	0.516313	0.0102401
35114	0.499178	0.0104453	0.505706	0.0104453
45114	0.339146	0.0133581	0.338709	0.0133581
55114	0.247503	0.0126565	0.24972	0.0126565
11214	0.804555	0.00642459	0.818043	0.00642459
21214	0.76434	0.00680728	0.776078	0.00680728
31214	0.754175	0.00702124	0.765471	0.00702124
41214	0.594144	0.0101993	0.598474	0.0101993
51214	0.5025	0.010323	0.509485	0.010323
12214	0.766225	0.00667479	0.778045	0.00667479
22214	0.726009	0.00944022	0.736079	0.00944022
32214	0.715845	0.00787057	0.725472	0.00787057
42214	0.555814	0.0104395	0.558475	0.0104395
52214	0.46417	0.0108313	0.469487	0.0108313
13214	0.756537	0.00676491	0.767935	0.00676491
23214	0.716322	0.00783825	0.725969	0.00783825
33214	0.706157	0.00909099	0.715363	0.00909099
43214	0.546126	0.0101704	0.548365	0.0101704
53214	0.454482	0.0102332	0.459377	0.0102332
14214	0.604007	0.0100736	0.608766	0.0100736
24214	0.563792	0.0102638	0.5668	0.0102638
34214	0.553627	0.00971296	0.556193	0.00971296
44214	0.393596	0.0139559	0.389196	0.0139559
54214	0.301952	0.0123583	0.300208	0.0123583
15214	0.516659	0.0103425	0.523949	0.0103425
25214	0.476444	0.0107423	0.481983	0.0107423
35214	0.466279	0.00970598	0.471376	0.00970598
45214	0.306248	0.0124818	0.304379	0.0124818
55214	0.214605	0.0119634	0.21539	0.0119634
11314	0.79624	0.00789776	0.809366	0.00789776
21314	0.756025	0.00658983	0.767401	0.00658983
31314	0.74586	0.00938271	0.756794	0.00938271
41314	0.585829	0.0109504	0.589797	0.0109504
51314	0.494186	0.0107962	0.500808	0.0107962
12314	0.75791	0.00646735	0.769368	0.00646735
22314	0.717694	0.00789803	0.727402	0.00789803
32314	0.70753	0.00876685	0.716795	0.00876685
42314	0.547499	0.0100521	0.549798	0.0100521
52314	0.455855	0.0101728	0.46081	0.0101728
13314	0.748222	0.00908064	0.759258	0.00908064
23314	0.708007	0.00860928	0.717293	0.00860928
33314	0.697842	0.0117038	0.706686	0.0117038
43314	0.537811	0.0116154	0.539689	0.0116154
53314	0.446167	0.0114152	0.4507	0.0114152
14314	0.595692	0.0106143	0.600089	0.0106143
24314	0.555477	0.00961865	0.558123	0.00961865
34314	0.545312	0.011098	0.547516	0.011098
44314	0.385281	0.0141683	0.380519	0.0141683
54314	0.293638	0.0123616	0.291531	0.0123616
15314	0.508344	0.0105056	0.515272	0.0105056
25314	0.468129	0.00973578	0.473306	0.00973578
35314	0.457965	0.0107352	0.462699	0.0107352
45314	0.297933	0.012409	0.295702	0.012409
55314	0.20629	0.011637	0.206713	0.011637
11414	0.665326	0.00907094	0.672754	0.00907094
21414	0.625111	0.00811335	0.630789	0.00811335
31414	0.614947	0.00919191	0.620182	0.00919191
41414	0.454915	0.0134126	0.453185	0.0134126
51414	0.363272	0.011908	0.364196	0.011908
12414	0.626996	0.0082664	0.632756	0.0082664
22414	0.586781	0.00955923	0.59079	0.00955923
32414	0.576616	0.00893942	0.580183	0.00893942
42414	0.416585	0.0129472	0.413186	0.0129472
52414	0.324942	0.0116331	0.324197	0.0116331
13414	0.617308	0.00924037	0.622646	0.00924037
23414	0.577093	0.00891848	0.58068	0.00891848
33414	0.566928	0.0107914	0.570074	0.0107914
43414	0.406897	0.0133388	0.403076	0.0133388
53414	0.315254	0.0117715	0.314088	0.0117715
14414	0.464778	0.0138896	0.463477	0.0138896
24414	0.424563	0.0132389	0.421511	0.0132389
34414	0.414399	0.0134154	0.410904	0.0134154
44414	0.254367	0.0179186	0.243907	0.0179186
54414	0.162724	0.0154403	0.154919	0.0154403
15414	0.37743	0.0129318	0.37866	0.0129318
25414	0.337215	0.0124154	0.336694	0.0124154
35414	0.327051	0.0121925	0.326087	0.0121925
45414	0.16702	0.0158406	0.15909	0.0158406
55414	0.0753761	0.0140576	0.0701013	0.0140576
11514	0.590357	0.00839942	0.599957	0.00839942
21514	0.550142	0.00807498	0.557991	0.00807498
31514	0.539978	0.0087248	0.547385	0.0087248
41514	0.379946	0.0116383	0.380387	0.0116383
51514	0.288303	0.0111332	0.291399	0.0111332
12514	0.552027	0.00828884	0.559959	0.00828884
22514	0.511812	0.010142	0.517993	0.010142
32514	0.501647	0.00914588	0.507386	0.00914588
42514	0.341616	0.0116312	0.340389	0.0116312
52514	0.249973	0.0113833	0.2514	0.0113833
13514	0.542339	0.00887491	0.549849	0.00887491
23514	0.502124	0.00916675	0.507883	0.00916675
33514	0.491959	0.0106393	0.497276	0.0106393
43514	0.331928	0.0117723	0.330279	0.0117723
53514	0.240285	0.0112173	0.241291	0.0112173
14514	0.389809	0.0125687	0.39068	0.0125687
24514	0.349594	0.0123057	0.348714	0.0123057
34514	0.33943	0.0121813	0.338107	0.0121813
44514	0.179398	0.0159189	0.17111	0.0159189
54514	0.0877549	0.0140475	0.0821214	0.0140475
15514	0.302461	0.0126918	0.305862	0.0126918
25514	0.262246	0.0126136	0.263897	0.0126136
35514	0.252082	0.0120777	0.25329	0.0120777
[truncated: 1,127 more rows]
